# Supplementary material for: Single-cell dissection of prognostic architecture and immunotherap response in Helicobacter pylori infection-associated gastric cancer
Source: eLife. 2025 Jun 17;13:RP99337. doi: 10.7554/eLife.99337 (PMC12173458; doi:10.7554/eLife.99337)
Supplement: Supplementary file 1. [file elife-99337-supp1.xlsx]

## Sheet: Table S1
Supplementary Table S1 DEGs of 9 main cell types
	p_val	avg_log2FC	pct.1	pct.2	p_val_adj	cluster	gene
1	0	4.05472	0.427	0.016	0	EPI_M	KRT17
2	0	3.41304	0.333	0.082	0	EPI_M	S100A9
3	0	2.99951	0.245	0.032	0	EPI_M	FABP1
4	0	2.89396	0.246	0.035	0	EPI_M	REG4
5	0	2.82965	0.194	0.012	0	EPI_M	S100A2
6	0	2.75683	0.861	0.206	0	EPI_M	KRT18
7	0	2.66663	0.154	0.006	0	EPI_M	NTS
8	0	2.60213	0.146	0.01	0	EPI_M	KRT5
9	0	2.49124	0.754	0.188	0	EPI_M	KRT19
10	0	2.47683	0.583	0.049	0	EPI_M	CLDN4
11	0	2.44863	0.339	0.062	0	EPI_M	TFF3
12	0	2.30704	0.892	0.237	0	EPI_M	KRT8
13	0	2.27144	0.504	0.137	0	EPI_M	LGALS4
14	0	2.13503	0.178	0.006	0	EPI_M	SERPINB3
15	0	2.13234	0.303	0.022	0	EPI_M	PRAP1
16	0	2.11521	0.147	0.005	0	EPI_M	KRT6A
17	0	2.07066	0.131	0.007	0	EPI_M	CALML3
18	0	2.06243	0.577	0.081	0	EPI_M	S100A14
19	0	2.04146	0.637	0.102	0	EPI_M	EPCAM
20	0	2.0326	0.541	0.087	0	EPI_M	SFN
21	0	1.99283	0.121	0.003	0	EPI_M	MIR205HG
22	0	1.99015	0.574	0.033	0	EPI_M	CLDN7
23	0	1.96598	0.393	0.017	0	EPI_M	CLDN3
24	0	1.94936	0.68	0.246	0	EPI_M	SPINT2
25	0	1.87493	0.53	0.176	0	EPI_M	MDK
26	1.8744e-281	2.06581	0.28	0.066	6.1651e-277	EPI_M	S100A8
27	3.3806e-274	2.67912	0.115	0.008	1.11191e-269	EPI_M	KRT14
28	1.08e-253	2.8879	0.156	0.021	3.55223e-249	EPI_M	SPINK4
29	7.76644e-194	1.88283	0.123	0.017	2.55446e-189	EPI_M	TCN1
30	1.08165e-156	1.86942	0.19	0.053	3.55766e-152	EPI_M	ANPEP
31	0	7.2538	0.673	0.098	0	EPI	GKN1
32	0	6.72615	0.875	0.155	0	EPI	MUC5AC
33	0	6.05606	0.9	0.187	0	EPI	TFF1
34	0	5.91875	0.909	0.153	0	EPI	TFF2
35	0	5.66318	0.611	0.179	0	EPI	PGC
36	0	5.53033	0.696	0.033	0	EPI	GKN2
37	0	4.90068	0.536	0.024	0	EPI	MUCL3
38	0	4.49349	0.816	0.07	0	EPI	PSCA
39	0	3.74485	0.689	0.045	0	EPI	CAPN8
40	0	3.63253	0.834	0.202	0	EPI	LYZ
41	0	3.6183	0.829	0.095	0	EPI	SPINK1
42	0	3.55833	0.907	0.105	0	EPI	MUC1
43	0	3.52557	0.878	0.095	0	EPI	CA2
44	0	3.39579	0.893	0.185	0	EPI	AGR2
45	0	3.39205	0.857	0.053	0	EPI	CLDN18
46	0	3.28489	0.921	0.292	0	EPI	CYSTM1
47	0	3.27029	0.839	0.153	0	EPI	S100P
48	0	2.99966	0.857	0.05	0	EPI	VSIG2
49	0	2.86532	0.79	0.047	0	EPI	CTSE
50	0	2.75	0.764	0.066	0	EPI	MLPH
51	0	2.7454	0.595	0.164	0	EPI	PHGR1
52	0	2.73764	0.846	0.136	0	EPI	RNASE1
53	0	2.69621	0.65	0.042	0	EPI	SULT1C2
54	0	2.65321	0.357	0.042	0	EPI	MSMB
55	0	2.58523	0.598	0.123	0	EPI	SYTL2
56	0	2.57293	0.547	0.039	0	EPI	RASEF
57	0	2.54586	0.596	0.06	0	EPI	CYP3A5
58	2.33774e-172	5.55196	0.253	0.085	7.68905e-168	EPI	LIPF
59	6.32183e-151	4.14721	0.233	0.081	2.07931e-146	EPI	MUC6
60	4.35732e-20	4.55758	0.128	0.078	1.43317e-15	EPI	PGA3
61	0	4.68896	0.867	0.017	0	Endo	PLVAP
62	0	3.86617	0.884	0.039	0	Endo	RAMP2
63	0	3.66445	0.781	0.008	0	Endo	VWF
64	0	3.52022	0.783	0.097	0	Endo	PECAM1
65	0	3.43268	0.974	0.153	0	Endo	IGFBP7
66	0	3.41169	0.834	0.109	0	Endo	HSPG2
67	0	3.39955	0.9	0.095	0	Endo	SPARCL1
68	0	3.30563	0.842	0.068	0	Endo	GNG11
69	0	3.28506	0.896	0.109	0	Endo	CRIP2
70	0	3.2473	0.634	0.151	0	Endo	CD320
71	0	3.13187	0.345	0.005	0	Endo	ACKR1
72	0	3.04927	0.688	0.056	0	Endo	COL4A1
73	0	3.03909	0.531	0.046	0	Endo	SERPINE1
74	0	3.01625	0.729	0.075	0	Endo	COL4A2
75	0	3.01428	0.594	0.005	0	Endo	CLDN5
76	0	2.92602	0.716	0.131	0	Endo	SLC9A3R2
77	0	2.86136	0.748	0.007	0	Endo	RAMP3
78	0	2.86133	0.782	0.065	0	Endo	ENG
79	0	2.81206	0.753	0.026	0	Endo	EGFL7
80	0	2.7905	0.76	0.096	0	Endo	PRSS23
81	0	2.78173	0.755	0.055	0	Endo	HYAL2
82	0	2.77618	0.641	0.032	0	Endo	COL15A1
83	0	2.74752	0.849	0.103	0	Endo	A2M
84	0	2.63135	0.851	0.114	0	Endo	SPARC
85	0	2.5557	0.777	0.155	0	Endo	TM4SF1
86	0	2.54759	0.735	0.081	0	Endo	CAV1
87	0	2.54203	0.81	0.121	0	Endo	NPDC1
88	0	2.53169	0.973	0.369	0	Endo	IFITM3
89	0	2.50586	0.604	0.005	0	Endo	SOX18
90	0	2.49668	0.681	0.006	0	Endo	CLEC14A
91	0	5.2596	0.555	0.104	0	Fib	CFD
92	0	5.12202	0.863	0.036	0	Fib	DCN
93	0	4.9034	0.508	0.034	0	Fib	CXCL14
94	0	4.39988	0.695	0.025	0	Fib	LUM
95	0	4.33497	0.603	0.059	0	Fib	TAGLN
96	0	4.27805	0.827	0.047	0	Fib	COL1A1
97	0	4.2234	0.828	0.029	0	Fib	COL3A1
98	0	4.21027	0.887	0.031	0	Fib	COL1A2
99	0	4.18329	0.637	0.085	0	Fib	MGP
100	0	4.14304	0.473	0.019	0	Fib	APOD
101	0	4.05783	0.444	0.019	0	Fib	POSTN
102	0	3.9411	0.304	0.025	0	Fib	RGS5
103	0	3.9273	0.746	0.012	0	Fib	MFAP4
104	0	3.85597	0.959	0.065	0	Fib	CALD1
105	0	3.84441	0.857	0.039	0	Fib	RARRES2
106	0	3.81292	0.695	0.029	0	Fib	IGFBP5
107	0	3.78977	0.568	0.057	0	Fib	ACTA2
108	0	3.75097	0.819	0.075	0	Fib	MYL9
109	0	3.70682	0.913	0.048	0	Fib	COL6A2
110	0	3.6832	0.624	0.021	0	Fib	FBLN1
111	0	3.67702	0.655	0.058	0	Fib	CTGF
112	0	3.63236	0.857	0.029	0	Fib	C1S
113	0	3.57502	0.584	0.038	0	Fib	IGFBP6
114	0	3.51197	0.876	0.056	0	Fib	SERPING1
115	0	3.47649	0.783	0.021	0	Fib	SOD3
116	0	3.47383	0.28	0.013	0	Fib	SFRP2
117	0	3.4163	0.941	0.127	0	Fib	IGFBP7
118	0	3.3762	0.698	0.03	0	Fib	MMP2
119	0	3.3373	0.807	0.068	0	Fib	TPM2
120	0	3.32271	0.735	0.038	0	Fib	SERPINF1
121	0	4.54784	0.495	0.056	0	Mono/Mac	G0S2
122	0	4.34434	0.964	0.092	0	Mono/Mac	TYROBP
123	0	4.17803	0.491	0.025	0	Mono/Mac	C1QA
124	0	4.17307	0.47	0.024	0	Mono/Mac	C1QB
125	0	4.15752	0.472	0.052	0	Mono/Mac	CXCL8
126	0	4.00881	0.453	0.021	0	Mono/Mac	C1QC
127	0	3.76828	0.844	0.032	0	Mono/Mac	AIF1
128	0	3.71245	0.877	0.068	0	Mono/Mac	FCER1G
129	0	3.65987	0.992	0.918	0	Mono/Mac	FTL
130	0	3.56176	0.386	0.021	0	Mono/Mac	IL1B
131	0	3.45091	0.996	0.959	0	Mono/Mac	FTH1
132	0	3.29772	0.369	0.051	0	Mono/Mac	APOC1
133	0	3.29253	0.78	0.28	0	Mono/Mac	SOD2
134	0	3.28131	0.414	0.056	0	Mono/Mac	CCL3
135	0	3.18452	0.776	0.322	0	Mono/Mac	CTSB
136	0	3.12761	0.496	0.069	0	Mono/Mac	S100A8
137	0	2.93034	0.753	0.386	0	Mono/Mac	GPX1P1
138	0	2.92275	0.741	0.246	0	Mono/Mac	NAMPT
139	0	2.80742	0.833	0.418	0	Mono/Mac	HLA-DRB1
140	0	2.80186	0.309	0.04	0	Mono/Mac	CCL3L1
141	0	2.74856	0.977	0.738	0	Mono/Mac	SAT1
142	0	2.7381	0.765	0.062	0	Mono/Mac	SPI1
143	0	2.732	0.852	0.343	0	Mono/Mac	HLA-DRA
144	0	2.70885	0.627	0.115	0	Mono/Mac	BCL2A1
145	0	2.69302	0.581	0.011	0	Mono/Mac	MS4A6A
146	0	2.69009	0.785	0.386	0	Mono/Mac	HLA-DPA1
147	1.14543e-290	2.77828	0.156	0.01	3.76743e-286	Mono/Mac	SPP1
148	2.91246e-267	3.21025	0.367	0.08	9.57936e-263	Mono/Mac	APOE
149	2.79886e-204	2.72621	0.716	0.377	9.20571e-200	Mono/Mac	TIMP1
150	4.83958e-98	2.92354	0.107	0.017	1.59179e-93	Mono/Mac	CXCL5
151	0	7.59573	1	0.019	0	Mast	TPSAB1
152	0	6.38279	0.771	0.007	0	Mast	TPSB2
153	0	5.97375	0.953	0.007	0	Mast	CPA3
154	0	5.22245	0.689	0.003	0	Mast	TPSD1
155	0	4.20645	0.893	0.013	0	Mast	GATA2
156	0	4.03547	0.842	0.013	0	Mast	KIT
157	0	3.49136	0.873	0.049	0	Mast	LTC4S
158	0	3.2903	0.86	0.005	0	Mast	HPGDS
159	0	3.19326	0.851	0.042	0	Mast	VWA5A
160	0	2.87489	0.687	0.001	0	Mast	MS4A2
161	0	2.86096	0.884	0.153	0	Mast	CLU
162	0	2.86024	0.76	0.005	0	Mast	SLC18A2
163	0	2.82221	0.729	0.007	0	Mast	HDC
164	0	2.65289	0.522	0.062	0	Mast	CSF1
165	0	2.53873	0.927	0.239	0	Mast	ALOX5AP
166	0	2.51878	0.571	0.004	0	Mast	RHEX
167	0	2.50881	0.716	0.008	0	Mast	IL1RL1
168	0	2.39788	0.56	0.016	0	Mast	SLC24A3
169	0	2.35742	0.707	0.07	0	Mast	ALOX5
170	4.43162e-264	2.32492	0.862	0.263	1.4576e-259	Mast	CD9
171	1.99457e-235	2.15627	0.876	0.303	6.56034e-231	Mast	CAPG
172	2.72185e-224	2.38069	0.891	0.329	8.95244e-220	Mast	GLUL
173	3.23539e-219	2.34207	1	0.65	1.06415e-214	Mast	VIM
174	1.17288e-184	2.51423	0.724	0.234	3.85772e-180	Mast	SOCS1
175	1.07084e-180	2.21725	0.902	0.398	3.5221e-176	Mast	ANXA1
176	8.70675e-180	2.37303	0.831	0.353	2.86374e-175	Mast	NFKBIZ
177	4.27186e-165	2.92059	0.693	0.22	1.40506e-160	Mast	AREG
178	4.63185e-162	2.51468	0.858	0.426	1.52346e-157	Mast	LMNA
179	1.01497e-116	2.16924	0.804	0.43	3.33834e-112	Mast	TNFAIP3
180	1.81867e-87	2.1712	0.713	0.362	5.98177e-83	Mast	TUBA1A
181	0	6.76564	0.872	0.181	0	Plasma	JCHAIN
182	0	6.3064	0.555	0.096	0	Plasma	IGLV6-57
183	0	6.22114	0.238	0.033	0	Plasma	IGKV1-39
184	0	6.16621	0.784	0.104	0	Plasma	IGHA1
185	0	5.80889	0.647	0.108	0	Plasma	IGKC
186	0	5.76195	0.29	0.05	0	Plasma	IGKV1-12
187	0	5.74937	0.788	0.09	0	Plasma	IGLL5
188	0	5.49677	0.243	0.03	0	Plasma	IGKV1-9
189	9.64803e-249	6.18357	0.301	0.068	3.17334e-244	Plasma	IGHV4-34
190	5.60512e-233	5.80768	0.189	0.029	1.84358e-228	Plasma	IGKV1D-39
191	5.66891e-219	6.48531	0.491	0.172	1.86456e-214	Plasma	IGKV1-5
192	3.59628e-216	5.62992	0.162	0.022	1.18285e-211	Plasma	IGKV1-27
193	2.67897e-190	6.27727	0.358	0.105	8.81141e-186	Plasma	IGKV3-11
194	5.76158e-185	6.06443	0.218	0.047	1.89504e-180	Plasma	IGHV1-69D
195	6.16126e-184	5.50104	0.251	0.061	2.0265e-179	Plasma	IGHV3-30
196	2.17484e-173	5.53575	0.484	0.174	7.15326e-169	Plasma	IGKV4-1
197	2.0612e-168	5.70627	0.517	0.197	6.77949e-164	Plasma	IGKV3-20
198	6.11991e-166	5.59978	0.203	0.045	2.0129e-161	Plasma	IGHV3-7
199	6.29247e-164	5.54389	0.182	0.037	2.06966e-159	Plasma	IGHV3-48
200	1.79008e-163	5.61082	0.151	0.026	5.88777e-159	Plasma	IGKV2D-28
201	2.78276e-151	5.47055	0.287	0.084	9.15276e-147	Plasma	IGKV3-15
202	4.79818e-131	5.68456	0.241	0.07	1.57817e-126	Plasma	IGLV2-11
203	1.24051e-115	6.36884	0.301	0.103	4.08016e-111	Plasma	IGLV1-40
204	3.86404e-107	5.99969	0.384	0.156	1.27092e-102	Plasma	IGLV2-14
205	4.75195e-102	5.90679	0.218	0.069	1.56296e-97	Plasma	IGLV1-47
206	1.46694e-101	5.47576	0.156	0.04	4.82491e-97	Plasma	IGLV3-10
207	2.65088e-77	5.66803	0.162	0.051	8.719e-73	Plasma	IGLV7-46
208	3.30102e-72	5.72752	0.203	0.074	1.08574e-67	Plasma	IGLV1-51
209	2.269e-37	5.81643	0.103	0.039	7.46296e-33	Plasma	IGHV2-5
210	4.46914e-05	6.61503	0.112	0.094	1	Plasma	IGJ
211	0	3.55726	0.895	0.011	0	B	MS4A1
212	0	3.07982	0.992	0.308	0	B	HLA-DRA
213	0	3.06501	0.81	0.121	0	B	CD83
214	0	3.00178	0.932	0.123	0	B	CD79A
215	0	2.8736	0.723	0.016	0	B	VPREB3
216	0	2.79415	0.999	0.718	0	B	CD74
217	0	2.47223	0.944	0.345	0	B	CD37
218	0	2.46848	0.904	0.208	0	B	HLA-DQB1
219	0	2.36582	0.899	0.172	0	B	HLA-DQA1
220	0	2.35612	0.665	0.024	0	B	BANK1
221	0	2.2025	0.956	0.301	0	B	HLA-DPB1
222	0	2.17382	0.54	0.076	0	B	CD79B
223	0	2.16357	0.965	0.351	0	B	HLA-DPA1
224	0	2.13756	0.972	0.386	0	B	HLA-DRB1
225	0	2.076	0.308	0.002	0	B	TCL1A
226	0	2.02808	0.66	0.133	0	B	MEF2C
227	0	1.9927	0.607	0.069	0	B	IRF8
228	0	1.85915	0.905	0.357	0	B	CXCR4
229	0	1.78493	0.524	0.039	0	B	CD19
230	0	1.7178	0.742	0.173	0	B	LTB
231	0	1.71511	0.389	0.016	0	B	LINC00926
232	0	1.71239	0.448	0.091	0	B	LY9
233	0	1.70945	0.732	0.226	0	B	HLA-DMA
234	0	1.69733	0.571	0.185	0	B	SMIM14
235	0	1.66145	0.914	0.378	0	B	LAPTM5
236	0	1.65785	0.412	0.027	0	B	TNFRSF13C
237	0	1.6377	0.469	0.025	0	B	FCRLA
238	0	1.60209	0.895	0.326	0	B	CD52
239	0	1.58863	0.508	0.067	0	B	HLA-DMB
240	0	1.58118	0.585	0.186	0	B	HLA-DRB5
241	0	4.23043	0.64	0.072	0	T	CCL5
242	0	3.53532	0.782	0.044	0	T	CD7
243	0	3.50561	0.499	0.111	0	T	CCL4
244	0	3.46751	0.888	0.031	0	T	CD3E
245	0	3.44001	0.5	0.025	0	T	GZMA
246	0	3.37825	0.606	0.05	0	T	IL7R
247	0	3.37601	0.197	0.031	0	T	GNLY
248	0	3.37447	0.805	0.016	0	T	CD3D
249	0	3.31827	0.522	0.045	0	T	NKG7
250	0	2.99798	0.916	0.277	0	T	IL32
251	0	2.91252	0.748	0.021	0	T	CD2
252	0	2.83883	0.295	0.081	0	T	CCL4L2
253	0	2.82002	0.392	0.023	0	T	GZMB
254	0	2.66138	0.434	0.016	0	T	KLRB1
255	0	2.55458	0.574	0.041	0	T	CST7
256	0	2.27121	0.855	0.221	0	T	PTPRC
257	0	2.24977	0.726	0.134	0	T	HCST
258	0	2.23275	0.385	0.011	0	T	CD8A
259	0	2.22089	0.654	0.217	0	T	DUSP2
260	0	2.21817	0.597	0.015	0	T	CD3G
261	0	2.18865	0.224	0.007	0	T	GZMK
262	0	2.15823	0.68	0.12	0	T	FYN
263	0	2.13461	0.398	0.013	0	T	PRF1
264	0	2.11906	0.735	0.173	0	T	EVL
265	0	2.08578	0.715	0.208	0	T	LEPROTL1
266	0	2.07835	0.633	0.039	0	T	LCK
267	0	2.04974	0.689	0.168	0	T	ETS1
268	0	2.03508	0.296	0.012	0	T	GZMH
269	0	2.00188	0.672	0.471	0	T	DNAJB1
270	0	1.99402	0.729	0.467	0	T	SARAF
