# Supplementary material for: Single-cell dissection of prognostic architecture and immunotherap response in Helicobacter pylori infection-associated gastric cancer
Source: eLife. 2025 Jun 17;13:RP99337. doi: 10.7554/eLife.99337 (PMC12173458; doi:10.7554/eLife.99337)
Supplement: Supplementary file 2. [file elife-99337-supp2.xlsx]

## Sheet: Table S2
Supplementary Table S2 DEGs of 6 malignant epithelium subclusters
	p_val	avg_log2FC	pct.1	pct.2	p_val_adj	cluster	gene
1	6.96098e-251	0.769027	0.434	0.069	2.05307e-246	M1	ASCL2
2	3.42625e-249	1.23259	0.77	0.286	1.01054e-244	M1	CLDN3
3	3.53501e-235	0.686407	0.642	0.18	1.04262e-230	M1	PRAP1
4	2.25804e-232	0.670614	0.359	0.046	6.65987e-228	M1	DPEP1
5	1.16788e-228	0.964737	0.913	0.424	3.44456e-224	M1	GPX2
6	1.3072e-221	1.4617	0.838	0.386	3.85547e-217	M1	MDK
7	2.22088e-213	0.826911	0.656	0.212	6.55025e-209	M1	CES2
8	4.13312e-203	1.54864	0.984	0.845	1.21902e-198	M1	RPL7
9	1.49772e-197	0.939326	0.913	0.463	4.41737e-193	M1	TSPAN8
10	2.01983e-197	0.724312	0.59	0.19	5.95729e-193	M1	GGH
11	3.93217e-196	0.899125	0.66	0.227	1.15975e-191	M1	TMEM176A
12	2.09723e-165	0.672716	0.651	0.238	6.18558e-161	M1	TMEM176B
13	1.42383e-155	1.44446	0.902	0.501	4.19944e-151	M1	RPS20
14	5.5647e-155	0.814201	0.903	0.491	1.64125e-150	M1	CLDN4
15	1.44594e-153	1.10038	0.488	0.156	4.26465e-149	M1	WFDC2
16	2.58403e-151	1.29893	0.687	0.297	7.62132e-147	M1	LYZ
17	2.71641e-147	0.92315	0.731	0.33	8.01177e-143	M1	SPINK1
18	2.05951e-141	2.00049	0.425	0.138	6.07432e-137	M1	OLFM4
19	1.15271e-138	1.21281	0.397	0.115	3.39981e-134	M1	DMBT1
20	6.59229e-125	0.757335	0.298	0.072	1.94433e-120	M1	RBP4
21	9.23702e-115	0.738948	0.387	0.122	2.72437e-110	M1	PCK1
22	2.60136e-109	0.710747	0.906	0.588	7.67245e-105	M1	IFI27
23	1.77589e-108	0.744011	0.351	0.111	5.23781e-104	M1	PSMA2-1
24	7.47009e-107	0.685472	0.34	0.105	2.20323e-102	M1	ATP5C1
25	3.12106e-106	0.785151	0.952	0.647	9.20525e-102	M1	RPL27A
26	3.26879e-106	0.675423	0.224	0.043	9.64098e-102	M1	KRT23
27	3.26801e-103	0.630532	0.342	0.105	9.63867e-99	M1	ATP5F1
28	7.84894e-100	0.703363	0.349	0.114	2.31497e-95	M1	ATP5B
29	2.29649e-99	0.674399	0.342	0.113	6.77327e-95	M1	C14orf166
30	1.02947e-97	0.936016	0.376	0.142	3.03631e-93	M1	ATP5G2
31	8.37598e-92	1.21058	0.957	0.721	2.47041e-87	M1	LGALS3
32	9.55982e-92	0.904458	0.366	0.134	2.81957e-87	M1	ATP5O
33	1.1119e-87	0.963666	0.379	0.155	3.27945e-83	M1	ATP5L
34	5.23585e-87	1.29972	0.444	0.187	1.54426e-82	M1	REG1A
35	1.62608e-85	0.740655	0.35	0.127	4.79598e-81	M1	ATP5G1
36	2.73838e-85	1.28119	0.387	0.171	8.07656e-81	M1	GNB2L1
37	3.23689e-84	0.976957	0.518	0.243	9.54688e-80	M1	PIGR
38	1.08342e-83	0.937881	0.371	0.142	3.19543e-79	M1	ATP5G3
39	4.52668e-81	0.864703	0.306	0.097	1.3351e-76	M1	PGC
40	4.19559e-80	0.788152	0.366	0.148	1.23745e-75	M1	SHFM1
41	2.91504e-78	0.689534	0.931	0.659	8.59763e-74	M1	RPS29
42	1.95227e-77	0.932861	0.704	0.377	5.75802e-73	M1	LCN2
43	1.82012e-75	0.665263	0.372	0.152	5.36827e-71	M1	C14orf2
44	8.77112e-73	0.943818	0.303	0.107	2.58695e-68	M1	UBD
45	4.3076e-72	0.732239	0.371	0.156	1.27048e-67	M1	USMG5
46	1.27053e-65	0.630404	0.376	0.157	3.74731e-61	M1	ATP5J2
47	1.74818e-63	1.19966	0.121	0.02	5.15609e-59	M1	REG3A
48	2.74274e-57	0.739596	0.388	0.178	8.08944e-53	M1	ATP5E
49	4.77134e-57	0.712522	0.958	0.79	1.40726e-52	M1	RPL13A
50	3.8889e-17	0.651642	0.331	0.209	1.14699e-12	M1	PLA2G2A
51	0	3.51397	0.728	0.146	0	M2	TFF2
52	0	2.83906	0.748	0.191	0	M2	REG4
53	0	2.69988	0.557	0.083	0	M2	LEFTY1
54	0	2.53523	0.81	0.127	0	M2	CLDN18
55	0	2.29592	0.991	0.661	0	M2	KRT19
56	0	2.17638	0.575	0.063	0	M2	CXCL17
57	0	2.07151	0.858	0.11	0	M2	CTSE
58	0	2.04192	0.687	0.121	0	M2	ARL14
59	0	1.99139	0.667	0.115	0	M2	PSCA
60	0	1.94884	0.974	0.523	0	M2	FXYD3
61	0	1.6573	0.76	0.172	0	M2	ANXA10
62	0	1.57115	0.893	0.255	0	M2	TSPAN1
63	0	1.57096	0.907	0.276	0	M2	TMC5
64	0	1.47921	0.687	0.119	0	M2	AKR1B10
65	0	1.47386	0.85	0.211	0	M2	PIGR
66	0	1.38677	0.346	0.019	0	M2	DPCR1
67	0	1.28453	0.6	0.064	0	M2	MIA
68	0	1.22796	0.791	0.159	0	M2	LAMB3
69	0	1.20185	0.51	0.068	0	M2	B3GNT7
70	0	1.18679	0.759	0.176	0	M2	MUC13
71	8.96526e-308	1.38409	0.813	0.231	2.64421e-303	M2	PLAC8
72	2.06024e-303	1.46506	0.824	0.222	6.07647e-299	M2	PDZK1IP1
73	3.57972e-293	1.73482	0.977	0.427	1.0558e-288	M2	LGALS4
74	4.26384e-284	1.92074	0.868	0.298	1.25758e-279	M2	LYZ
75	1.92693e-281	2.56295	0.816	0.272	5.6833e-277	M2	TFF3
76	4.35788e-276	1.31875	0.693	0.176	1.28531e-271	M2	SRD5A3
77	3.86629e-256	1.50414	0.837	0.298	1.14032e-251	M2	AGR3
78	4.84219e-254	1.26836	0.9	0.343	1.42815e-249	M2	C12orf75
79	1.42874e-250	1.64784	0.961	0.49	4.21392e-246	M2	TSPAN8
80	1.38752e-249	1.36235	0.914	0.39	4.09234e-245	M2	NQO1
81	1.56916e-243	2.09126	0.909	0.369	4.62808e-239	M2	LCN2
82	1.47565e-237	3.02285	0.868	0.456	4.35227e-233	M2	TFF1
83	7.66555e-218	1.16704	0.878	0.351	2.26088e-213	M2	TACSTD2
84	1.46985e-208	1.4964	0.822	0.277	4.33518e-204	M2	C15orf48
85	1.54369e-190	1.42429	0.759	0.269	4.55297e-186	M2	MT1E
86	1.93122e-184	1.66248	0.967	0.825	5.69594e-180	M2	AGR2
87	5.99266e-178	1.22435	0.463	0.114	1.76748e-173	M2	SELK
88	1.20856e-168	1.35731	0.476	0.126	3.56453e-164	M2	HN1
89	1.15706e-165	1.19756	0.713	0.264	3.41264e-161	M2	CA2
90	1.3503e-146	1.60493	0.725	0.301	3.98257e-142	M2	MT1X
91	2.62868e-145	1.28184	0.664	0.244	7.75303e-141	M2	MT1G
92	3.13832e-133	1.29342	0.811	0.347	9.25615e-129	M2	SPINK1
93	4.73312e-131	1.30588	0.685	0.276	1.39599e-126	M2	GDF15
94	6.72198e-126	1.29454	0.277	0.05	1.98258e-121	M2	IL8
95	2.18473e-103	1.15679	0.825	0.452	6.44364e-99	M2	CCT2
96	4.20647e-100	1.54944	0.375	0.111	1.24066e-95	M2	CCL20
97	6.78488e-94	1.48406	0.182	0.027	2.00113e-89	M2	SAA1
98	6.23466e-59	1.25352	0.441	0.208	1.83885e-54	M2	CEACAM6
99	7.99657e-28	1.21186	0.253	0.122	2.35851e-23	M2	PGC
100	1.98459e-14	1.38884	0.105	0.045	5.85336e-10	M2	LYPD2
101	9.65195e-207	1.79965	0.705	0.353	2.84674e-202	M3	PHGR1
102	1.74493e-125	1.75583	0.167	0.016	5.14649e-121	M3	REG1B
103	4.11466e-82	1.36638	0.407	0.19	1.21358e-77	M3	REG1A
104	5.93174e-77	1.02816	0.846	0.818	1.74951e-72	M3	RPL13A
105	5.83415e-76	1.0176	0.813	0.685	1.72072e-71	M3	RPS29
106	8.92481e-62	1.83619	0.333	0.168	2.63228e-57	M3	SPINK4
107	4.81219e-45	0.87117	0.753	0.696	1.41931e-40	M3	RPL27A
108	5.58686e-43	0.570114	0.65	0.459	1.64779e-38	M3	LGALS4
109	1.59723e-36	0.687582	0.627	0.493	4.71088e-32	M3	GPX2
110	3.8644e-36	0.40556	0.996	0.997	1.13977e-31	M3	S100A6
111	2.1702e-34	0.465502	0.532	0.376	6.40079e-30	M3	SPINK1
112	2.07375e-27	0.660438	0.121	0.048	6.11633e-23	M3	SNORD3A
113	5.62339e-27	0.625331	0.641	0.566	1.65856e-22	M3	RPS20
114	8.07434e-26	1.07199	0.563	0.545	2.38145e-21	M3	HIST1H4C
115	2.9669e-24	1.22402	0.318	0.238	8.75058e-20	M3	CENPW
116	4.80377e-24	0.978101	0.296	0.195	1.41682e-19	M3	TCEB2
117	2.85721e-23	0.837131	0.301	0.198	8.42705e-19	M3	ATP5E
118	1.68869e-22	0.952124	0.254	0.165	4.98063e-18	M3	ATP5D
119	1.56647e-21	1.04496	0.19	0.115	4.62014e-17	M3	SNORA76
120	2.49798e-20	1.04042	0.273	0.189	7.36754e-16	M3	ATP5I
121	8.02206e-19	0.816805	0.567	0.566	2.36603e-14	M3	TMEM141
122	1.36386e-15	1.23441	0.356	0.286	4.02257e-11	M3	MT1G
123	2.75332e-14	0.716543	0.361	0.311	8.12064e-10	M3	CDC42EP5
124	1.44111e-13	0.559669	0.432	0.371	4.25041e-09	M3	CLDN3
125	1.50794e-12	0.701386	0.281	0.213	4.44753e-08	M3	FABP1
126	3.25259e-11	0.589326	0.26	0.192	9.5932e-07	M3	UQCR11-1
127	3.26291e-10	0.847041	0.304	0.266	9.62363e-06	M3	PRAP1
128	3.71651e-10	0.661714	0.143	0.097	1.09615e-05	M3	FABP2
129	1.18827e-09	0.721049	0.223	0.177	3.50468e-05	M3	GLTSCR2
130	1.21211e-09	0.556221	0.343	0.509	3.57501e-05	M3	JUP
131	1.20638e-08	0.762323	0.152	0.106	0.000355811	M3	KRT20
132	8.95728e-08	0.738413	0.578	0.635	0.00264186	M3	FABP5
133	4.36808e-07	0.65193	0.211	0.176	0.0128832	M3	ATPIF1
134	8.30445e-07	0.443843	0.236	0.189	0.0244931	M3	USMG5
135	1.32503e-06	1.10369	0.156	0.121	0.0390806	M3	MT1H
136	1.64734e-06	0.498007	0.12	0.085	0.0485866	M3	NPW
137	1.85338e-06	1.43457	0.3	0.282	0.0546635	M3	PPP1R1B
138	2.61688e-06	0.598191	0.139	0.104	0.0771822	M3	ANPEP
139	2.77242e-06	0.739867	0.355	0.331	0.0817697	M3	MT1E
140	5.78177e-06	1.03091	0.224	0.323	0.170528	M3	RF00100.4
141	8.54403e-06	0.756735	0.495	0.536	0.251998	M3	SOX4
142	1.00305e-05	0.505745	0.224	0.189	0.295839	M3	C14orf2
143	8.18687e-05	0.419876	0.212	0.183	1	M3	C11orf31
144	0.000124961	0.414427	0.49	0.669	1	M3	ASS1
145	0.00314944	0.632938	0.116	0.099	1	M3	KLK1
146	0.00874968	0.698151	0.18	0.241	1	M3	MT1F
147	4.84525e-161	1.26968	0.597	0.116	1.42906e-156	M4	FXYD4
148	3.06739e-152	0.887048	0.655	0.141	9.04696e-148	M4	RTEL1-TNFRSF6B
149	3.38391e-146	1.09111	0.717	0.185	9.98052e-142	M4	AC023043.1
150	2.49749e-136	1.10617	0.752	0.203	7.36609e-132	M4	KLK8
151	1.83296e-132	0.961327	0.711	0.176	5.40614e-128	M4	FGL1
152	1.97475e-128	0.880786	0.726	0.193	5.82433e-124	M4	RIMKLB
153	2.43508e-126	0.91077	0.707	0.216	7.18203e-122	M4	TM7SF2
154	1.92105e-121	1.55428	0.942	0.618	5.66596e-117	M4	SLPI
155	7.36447e-121	0.974156	0.816	0.271	2.17208e-116	M4	RHOV
156	1.08069e-110	0.815479	0.82	0.331	3.1874e-106	M4	C18orf32
157	3.588e-102	1.13881	0.692	0.197	1.05824e-97	M4	INSL4
158	1.03933e-101	0.899722	0.842	0.356	3.0654e-97	M4	PRSS22
159	8.46519e-101	1.02072	0.859	0.427	2.49672e-96	M4	NAXE
160	5.01224e-98	1.13457	0.835	0.371	1.47831e-93	M4	CFD
161	1.23479e-95	0.946296	0.315	0.053	3.6419e-91	M4	S100A12
162	5.76609e-93	1.52223	0.792	0.332	1.70065e-88	M4	AQP3
163	8.18881e-93	1.22874	0.884	0.597	2.41521e-88	M4	GPX1P1
164	6.73446e-90	0.926117	0.814	0.383	1.98626e-85	M4	CD320
165	4.62786e-83	0.910687	0.854	0.43	1.36494e-78	M4	MYDGF
166	1.01209e-82	0.826535	0.775	0.313	2.98507e-78	M4	PI3
167	1.58235e-79	1.03886	0.961	0.653	4.66699e-75	M4	S100A14
168	6.87072e-75	1.2916	0.929	0.653	2.02645e-70	M4	CD55
169	2.6414e-66	0.888223	0.797	0.422	7.79053e-62	M4	FAM207A
170	8.40028e-66	1.05762	0.996	0.838	2.47758e-61	M4	CSTB
171	6.14777e-62	1.4701	0.857	0.506	1.81322e-57	M4	KRT17
172	1.34754e-59	1.04157	0.897	0.537	3.97444e-55	M4	PHLDA2
173	1.48267e-57	1.24652	0.606	0.265	4.37299e-53	M4	SFTA2
174	1.09034e-54	0.802157	0.998	0.997	3.21584e-50	M4	S100A6
175	3.10864e-54	0.990484	0.863	0.477	9.16861e-50	M4	S100A9
176	4.20006e-52	0.901905	0.831	0.515	1.23876e-47	M4	NR4A1
177	4.1426e-51	0.868159	0.246	0.058	1.22182e-46	M4	KRT6B
178	5.24577e-51	1.60814	0.632	0.281	1.54719e-46	M4	SERPINB3
179	5.47924e-51	1.55341	0.319	0.091	1.61605e-46	M4	S100A2
180	1.70226e-49	0.937407	0.842	0.499	5.02065e-45	M4	AREG
181	5.29713e-49	0.913349	0.807	0.487	1.56234e-44	M4	SERPINA1
182	2.38964e-46	0.966871	0.869	0.505	7.048e-42	M4	ANXA1
183	2.55956e-46	1.06516	0.522	0.213	7.54918e-42	M4	MSMB
184	1.22017e-45	1.33388	0.824	0.564	3.59876e-41	M4	CXCL3
185	2.62978e-45	1.0506	0.882	0.605	7.75627e-41	M4	FDPS
186	6.82301e-44	1.0126	0.961	0.831	2.01238e-39	M4	S100P
187	1.65185e-42	0.876319	0.876	0.521	4.87197e-38	M4	SFN
188	2.98562e-38	1.04286	0.737	0.438	8.8058e-34	M4	CXCL1
189	4.61206e-37	1.88338	0.54	0.29	1.36028e-32	M4	NTS
190	6.19323e-36	1.05304	0.452	0.189	1.82663e-31	M4	FGB
191	2.1774e-34	0.833392	0.869	0.616	6.42201e-30	M4	TM4SF1
192	4.63748e-34	0.873229	0.989	0.958	1.36778e-29	M4	KRT18
193	1.48262e-32	1.67383	0.625	0.33	4.37285e-28	M4	S100A8
194	1.90211e-26	0.902161	0.893	0.698	5.6101e-22	M4	HSPA1A
195	2.4179e-17	1.17635	0.428	0.228	7.13134e-13	M4	TCN1
196	3.01652e-10	1.01339	0.328	0.194	8.89692e-06	M4	FGG
197	0	2.40765	0.945	0.305	0	M5	S100A9
198	0	2.10526	0.752	0.108	0	M5	NTS
199	0	2.10324	0.49	0.075	0	M5	FGG
200	0	2.01822	0.714	0.122	0	M5	SERPINB3
201	0	2.00258	0.739	0.216	0	M5	VIM
202	0	1.9685	0.922	0.354	0	M5	KRT17
203	0	1.83991	0.683	0.201	0	M5	S100A8
204	0	1.77107	0.407	0.05	0	M5	GNLY
205	0	1.69503	0.472	0.079	0	M5	CCL5
206	0	1.30207	0.899	0.57	0	M5	CD55
207	0	1.12113	0.906	0.624	0	M5	HSPA1A
208	1.51872e-305	1.85083	0.472	0.088	4.4793e-301	M5	FGB
209	3.11202e-285	1.94052	0.438	0.078	9.1786e-281	M5	FGA
210	6.35578e-254	1.56949	0.706	0.418	1.87457e-249	M5	SCD
211	6.79167e-250	1.07884	0.838	0.518	2.00314e-245	M5	GPX1P1
212	1.70686e-243	1.174	0.744	0.404	5.03421e-239	M5	SERPINA1
213	2.35923e-242	2.23368	0.476	0.137	6.95831e-238	M5	TCN1
214	2.30193e-241	1.52558	0.528	0.179	6.78931e-237	M5	SRGN
215	5.41331e-238	1.10481	0.447	0.092	1.5966e-233	M5	SPARC
216	2.52878e-206	1.47133	0.425	0.118	7.45839e-202	M5	FGL1
217	4.75687e-202	1.44906	0.555	0.228	1.40299e-197	M5	LGALS1
218	1.89278e-185	1.34181	0.575	0.269	5.58257e-181	M5	AQP3
219	1.08435e-182	1.31092	0.441	0.137	3.19818e-178	M5	INSL4
220	6.85701e-160	1.19017	0.243	0.036	2.02241e-155	M5	GZMB
221	9.71528e-160	1.34915	0.477	0.188	2.86543e-155	M5	CXCL8
222	3.17539e-157	1.32368	0.333	0.086	9.36548e-153	M5	CCL4
223	2.85583e-154	1.38387	0.387	0.134	8.42297e-150	M5	GLIPR1
224	2.51705e-146	0.957842	0.302	0.065	7.42379e-142	M5	COL4A1
225	4.59397e-145	1.50747	0.502	0.28	1.35495e-140	M5	PLK2
226	9.72586e-139	1.22027	0.256	0.05	2.86854e-134	M5	RGS5
227	8.04651e-132	1.11851	0.273	0.063	2.37324e-127	M5	MGP
228	5.02052e-129	1.30575	0.5	0.283	1.48075e-124	M5	FURIN
229	6.00703e-126	1.05576	0.618	0.387	1.77171e-121	M5	CXCL1
230	8.21617e-126	1.12634	0.306	0.084	2.42328e-121	M5	CALD1
231	2.4671e-125	1.01479	0.568	0.328	7.27646e-121	M5	CFD
232	1.10465e-122	1.25948	0.483	0.274	3.25807e-118	M5	CTSL
233	2.09348e-110	1.09276	0.521	0.314	6.17451e-106	M5	MUC5B
234	9.23722e-103	1.0177	0.24	0.065	2.72443e-98	M5	VTN
235	1.47474e-101	1.0434	0.264	0.081	4.3496e-97	M5	TYROBP
236	2.78828e-95	1.00978	0.448	0.246	8.22375e-91	M5	RHOV
237	1.08587e-91	1.07597	0.362	0.171	3.20266e-87	M5	RIMKLB
238	5.61941e-89	1.12927	0.433	0.258	1.65739e-84	M5	PHLDA1
239	2.06228e-84	1.11245	0.445	0.285	6.0825e-80	M5	AL135905.2
240	1.7009e-77	1.01043	0.309	0.139	5.01664e-73	M5	NNMT
241	1.65137e-57	1.11895	0.249	0.113	4.87056e-53	M5	G0S2
242	2.18716e-50	0.989496	0.396	0.291	6.4508e-46	M5	SGK1
243	2.26468e-48	0.984921	0.207	0.089	6.67943e-44	M5	ACTA2
244	5.23972e-37	0.975813	0.414	0.358	1.5454e-32	M5	NR4A2
245	4.24717e-27	1.00088	0.323	0.255	1.25266e-22	M5	PDK4
246	3.82611e-24	1.13263	0.516	0.571	1.12847e-19	M5	ODC1
247	6.24612e-284	3.01414	0.742	0.105	1.84223e-279	M6	COL1A2
248	4.52574e-283	2.75475	0.745	0.102	1.33482e-278	M6	COL3A1
249	8.64899e-238	2.43759	0.636	0.086	2.55093e-233	M6	FN1
250	6.80444e-227	2.79875	0.814	0.169	2.0069e-222	M6	SPARC
251	5.64187e-225	3.39669	0.768	0.162	1.66401e-220	M6	COL1A1
252	2.12342e-205	1.7916	0.596	0.081	6.26282e-201	M6	COL6A2
253	3.74557e-197	2.14852	0.653	0.111	1.10472e-192	M6	COL4A1
254	1.37056e-191	1.9058	0.63	0.102	4.04232e-187	M6	SPARCL1
255	6.53765e-187	1.62892	0.272	0.014	1.92821e-182	M6	CCL11
256	1.08153e-182	1.54406	0.387	0.035	3.18987e-178	M6	MMP2
257	2.46855e-181	1.94668	0.673	0.125	7.28074e-177	M6	CALD1
258	2.08247e-172	2.05651	0.499	0.068	6.14203e-168	M6	LUM
259	3.61811e-157	1.55797	0.427	0.054	1.06712e-152	M6	SERPINF1
260	1.70573e-155	1.60462	0.467	0.065	5.03088e-151	M6	BGN
261	1.82118e-152	2.00693	0.579	0.114	5.37139e-148	M6	THBS1
262	6.26564e-152	2.0131	0.464	0.065	1.84799e-147	M6	DCN
263	2.17572e-143	2.24686	0.564	0.111	6.41708e-139	M6	TAGLN
264	3.79907e-136	1.83446	0.897	0.35	1.1205e-131	M6	VIM
265	3.3358e-135	1.52805	0.372	0.046	9.83862e-131	M6	COL6A3
266	7.77844e-131	1.07743	0.229	0.015	2.29417e-126	M6	POSTN
267	1.46646e-123	2.13433	0.501	0.095	4.32518e-119	M6	A2M
268	1.67932e-123	1.83711	0.622	0.172	4.95299e-119	M6	CTGF
269	6.41034e-115	1.94425	0.9	0.542	1.89067e-110	M6	TIMP1
270	1.43118e-109	1.38526	0.441	0.081	4.22111e-105	M6	SERPINE1
271	7.77915e-109	1.64773	0.493	0.106	2.29438e-104	M6	ACTA2
272	4.43738e-108	1.51521	0.424	0.08	1.30876e-103	M6	C1S
273	1.21259e-104	1.58984	0.788	0.305	3.5764e-100	M6	LGALS1
274	1.11569e-92	1.41926	0.484	0.109	3.2906e-88	M6	MGP
275	4.19861e-87	1.51262	0.404	0.089	1.23834e-82	M6	RARRES2
276	8.65369e-79	1.25674	0.384	0.086	2.55232e-74	M6	COL6A1
277	1.80236e-75	1.35605	0.401	0.1	5.31589e-71	M6	CYR61
278	8.53485e-73	0.99461	0.252	0.038	2.51727e-68	M6	MAP1B
279	1.35341e-65	1.52539	0.39	0.099	3.99174e-61	M6	RGS5
280	8.75019e-64	1.58814	0.55	0.218	2.58078e-59	M6	MYL9
281	1.68714e-56	1.25146	0.312	0.077	4.97605e-52	M6	TIMP3
282	1.29939e-53	1.22624	0.352	0.103	3.83241e-49	M6	SPON2
283	1.50047e-52	1.15697	0.372	0.11	4.42549e-48	M6	SERPING1
284	2.43016e-49	0.947831	0.289	0.071	7.1675e-45	M6	SOD3
285	5.05117e-48	1.6287	0.278	0.072	1.48979e-43	M6	SERPINA3
286	7.16112e-36	1.02754	0.828	0.664	2.1121e-31	M6	CD55
287	1.99289e-31	0.959948	0.708	0.496	5.87783e-27	M6	SCD
288	5.5312e-30	1.0466	0.395	0.185	1.63137e-25	M6	ICAM1
289	2.4003e-29	1.07288	0.378	0.174	7.07946e-25	M6	TIMP2
290	8.52945e-24	1.59968	0.117	0.025	2.51568e-19	M6	SFRP2
291	3.96906e-21	1.06037	0.447	0.282	1.17064e-16	M6	TPM2
292	4.29192e-21	1.04981	0.33	0.166	1.26586e-16	M6	ACSL4
293	9.29868e-21	1.12472	0.347	0.183	2.74255e-16	M6	GEM
294	1.47486e-20	0.943485	0.395	0.22	4.34995e-16	M6	PRSS23
295	1.70611e-14	0.949143	0.433	0.316	5.03201e-10	M6	HMGCS1
296	0.00216897	1.02947	0.08	0.143	1	M6	PGC
