# Supplementary material for: Single-cell dissection of prognostic architecture and immunotherap response in Helicobacter pylori infection-associated gastric cancer
Source: eLife. 2025 Jun 17;13:RP99337. doi: 10.7554/eLife.99337 (PMC12173458; doi:10.7554/eLife.99337)
Supplement: Supplementary file 3. [file elife-99337-supp3.xlsx]

## Sheet: Table S3
Supplementary Table S3 DEGs of 9 non-malignant epithelium subclusters
	p_val	avg_log2FC	pct.1	pct.2	p_val_adj	cluster	gene
1	0	5.50116	0.854	0.057	0	PMC	MUCL3
2	0	5.25969	0.999	0.314	0	PMC	GKN1
3	0	4.14906	0.998	0.598	0	PMC	MUC5AC
4	0	3.72243	0.988	0.332	0	PMC	GKN2
5	0	3.70999	0.91	0.32	0	PMC	CAPN8
6	0	3.23367	0.793	0.056	0	PMC	CEACAM5
7	0	3.17716	1	0.653	0	PMC	TFF1
8	0	3.05857	0.751	0.043	0	PMC	PSAPL1
9	0	3.01321	0.868	0.23	0	PMC	SYTL2
10	0	2.82975	0.812	0.219	0	PMC	RASEF
11	0	2.80648	0.669	0.012	0	PMC	SLC5A5
12	0	2.70185	0.78	0.083	0	PMC	LGALS9C
13	0	2.63979	0.989	0.574	0	PMC	PSCA
14	0	2.50666	0.447	0.001	0	PMC	BNIP5
15	0	2.38406	0.774	0.176	0	PMC	B4GALNT3
16	0	2.33394	0.545	0.001	0	PMC	PLAAT2
17	0	2.32964	0.681	0.063	0	PMC	LGALS9B
18	0	2.32037	0.828	0.304	0	PMC	LINC01133
19	0	2.3152	0.625	0.103	0	PMC	DDX60
20	0	2.30932	0.542	0.16	0	PMC	ANKRD36C
21	0	2.27721	0.783	0.229	0	PMC	VILL
22	0	2.24701	0.705	0.294	0	PMC	RNF213
23	0	2.23374	0.864	0.554	0	PMC	AHNAK
24	0	2.22799	0.423	0.035	0	PMC	DUOX2
25	0	2.20352	0.977	0.749	0	PMC	MUC1
26	0	2.14529	0.879	0.522	0	PMC	MLPH
27	0	2.12126	0.979	0.665	0	PMC	IFI27
28	0	2.03433	0.835	0.299	0	PMC	CYP3A5
29	0	2.03233	0.596	0.082	0	PMC	RFLNA
30	0	2.02506	0.888	0.483	0	PMC	GSN
31	0	3.98158	0.999	0.523	0	pre-PMC	RPS29
32	0	3.57833	0.985	0.345	0	pre-PMC	RPS20
33	0	3.53721	0.975	0.042	0	pre-PMC	GNB2L1
34	0	3.43229	0.998	0.556	0	pre-PMC	RPL27A
35	0	3.32748	0.987	0.375	0	pre-PMC	RPL36A
36	0	3.28763	0.999	0.667	0	pre-PMC	RPL13A
37	0	3.25057	0.993	0.519	0	pre-PMC	RPL37A
38	0	3.18568	0.973	0.426	0	pre-PMC	RPL7
39	0	3.1806	0.989	0.511	0	pre-PMC	RPL21
40	0	3.17759	0.996	0.524	0	pre-PMC	RPL31
41	0	3.12127	0.999	0.785	0	pre-PMC	RPL41
42	0	3.01488	0.984	0.352	0	pre-PMC	RPS10
43	0	2.87921	0.983	0.072	0	pre-PMC	ATP5E
44	0	2.84869	0.966	0.362	0	pre-PMC	RPL23
45	0	2.80176	0.971	0.052	0	pre-PMC	ATP5I
46	0	2.80033	0.992	0.559	0	pre-PMC	RPL23A
47	0	2.75029	0.993	0.529	0	pre-PMC	RPL38
48	0	2.74447	0.935	0.031	0	pre-PMC	ATP5G2
49	0	2.73745	1	0.804	0	pre-PMC	RPS27
50	0	2.71372	0.982	0.457	0	pre-PMC	RPL27
51	0	2.70608	0.999	0.709	0	pre-PMC	RPLP2
52	0	2.70253	0.839	0.113	0	pre-PMC	LIPF
53	0	2.59854	0.989	0.546	0	pre-PMC	RPS11
54	0	2.5664	0.99	0.543	0	pre-PMC	RPS16
55	0	2.52441	0.994	0.642	0	pre-PMC	RPL35
56	0	2.49628	0.883	0.025	0	pre-PMC	ATP5O
57	0	2.45867	0.94	0.053	0	pre-PMC	UQCR11-1
58	0	2.43983	0.994	0.681	0	pre-PMC	RPL39
59	0	2.43009	0.995	0.62	0	pre-PMC	RPL34
60	0	2.42862	0.93	0.042	0	pre-PMC	ATP5L
61	0	9.38177	0.977	0.102	0	Chief cell	PGA3
62	0	5.41439	0.675	0.003	0	Chief cell	PGA5
63	0	3.28557	0.823	0.053	0	Chief cell	PGA4
64	1.28302e-249	3.47947	0.997	0.262	4.21998e-245	Chief cell	LIPF
65	4.7914e-170	3.22106	1	0.524	1.57594e-165	Chief cell	PGC
66	1.4451e-143	1.3155	0.639	0.114	4.75308e-139	Chief cell	LTF
67	2.75925e-137	1.3665	0.846	0.225	9.07544e-133	Chief cell	REG1A
68	1.49838e-126	1.94092	0.882	0.326	4.92834e-122	Chief cell	MT1F
69	2.80625e-122	1.3179	0.757	0.179	9.23002e-118	Chief cell	LRRC75A-AS1
70	5.36452e-120	1.6699	0.82	0.245	1.76444e-115	Chief cell	MT1M
71	9.71507e-118	1.2535	0.715	0.185	3.19538e-113	Chief cell	PDIA2
72	6.35656e-113	1.2614	0.515	0.099	2.09074e-108	Chief cell	HLA-DPA1
73	1.36226e-112	1.32356	0.151	0.007	4.4806e-108	Chief cell	CHIA
74	5.7376e-98	1.38566	0.951	0.434	1.88715e-93	Chief cell	CXCL17
75	1.2921e-91	1.39946	0.692	0.225	4.24985e-87	Chief cell	AZGP1
76	4.21028e-91	1.28305	0.816	0.288	1.3848e-86	Chief cell	ATP5MC2
77	1.96809e-88	2.09659	0.885	0.453	6.47323e-84	Chief cell	CD74
78	1.36555e-86	1.57223	0.492	0.114	4.49141e-82	Chief cell	MIA
79	1.39227e-84	1.17044	0.866	0.383	4.5793e-80	Chief cell	DCXR
80	1.07512e-80	1.91344	0.97	0.602	3.53617e-76	Chief cell	MT1G
81	1.80612e-78	1.39903	0.816	0.365	5.94051e-74	Chief cell	RACK1
82	1.97393e-70	1.67167	0.879	0.454	6.49244e-66	Chief cell	MT1X
83	2.76677e-64	1.92256	0.748	0.402	9.10019e-60	Chief cell	HSPA1A
84	1.17084e-60	1.21732	0.436	0.116	3.85102e-56	Chief cell	ADH1C
85	2.5667e-57	1.18133	0.692	0.28	8.44214e-53	Chief cell	HLA-DRA
86	9.48675e-55	1.22955	0.639	0.257	3.12029e-50	Chief cell	HLA-DRB1
87	1.25118e-47	1.45494	0.931	0.672	4.11524e-43	Chief cell	MT2A
88	9.19983e-47	1.11193	0.954	0.685	3.02591e-42	Chief cell	MT1E
89	2.12642e-42	1.11901	0.734	0.413	6.99401e-38	Chief cell	HSPA1B
90	7.5655e-07	1.34856	0.239	0.132	0.0248837	Chief cell	PRR4
91	0	4.63578	0.938	0.076	0	Neck cell	LTF
92	0	4.58894	0.953	0.145	0	Neck cell	BPIFB1
93	0	4.58767	0.707	0.048	0	Neck cell	REG3A
94	0	4.32717	0.985	0.196	0	Neck cell	REG1A
95	0	3.73384	0.994	0.2	0	Neck cell	MUC6
96	0	3.68419	0.856	0.085	0	Neck cell	PRR4
97	0	3.58626	0.804	0.05	0	Neck cell	MTCO1P12
98	0	3.47733	0.948	0.299	0	Neck cell	MSMB
99	0	3.36878	0.925	0.266	0	Neck cell	LCN2
100	0	3.29447	0.826	0.049	0	Neck cell	GP2
101	0	3.21345	0.879	0.14	0	Neck cell	SERPINA1
102	0	2.90361	0.953	0.12	0	Neck cell	AQP5
103	0	2.88127	0.794	0.047	0	Neck cell	AC139749.1
104	0	2.71938	0.824	0.087	0	Neck cell	C6orf58
105	0	2.34218	0.693	0.01	0	Neck cell	SERPINA3
106	0	2.3157	0.708	0.033	0	Neck cell	TCN1
107	0	2.24259	0.869	0.21	0	Neck cell	ZG16B
108	0	2.23321	0.95	0.273	0	Neck cell	NME2
109	0	2.17527	0.673	0.091	0	Neck cell	CXCL2
110	0	1.89446	0.865	0.153	0	Neck cell	LRRC75A-AS1
111	0	1.84164	0.75	0.123	0	Neck cell	C2CD4B
112	0	1.7646	0.622	0.029	0	Neck cell	S100A1
113	1.55652e-296	3.08111	1	0.509	5.11956e-292	Neck cell	PGC
114	4.73237e-290	3.29556	1	0.771	1.55652e-285	Neck cell	LYZ
115	1.23529e-273	1.84893	0.985	0.233	4.063e-269	Neck cell	MT-RNR2
116	1.53058e-268	1.78341	0.92	0.264	5.03422e-264	Neck cell	ATP5MC2
117	2.13002e-265	2.14735	0.985	0.433	7.00584e-261	Neck cell	CD74
118	6.12091e-254	1.85295	0.961	0.341	2.01323e-249	Neck cell	RACK1
119	4.32241e-176	2.23333	0.32	0.035	1.42169e-171	Neck cell	AC090498.1
120	4.80314e-84	2.43898	0.241	0.044	1.5798e-79	Neck cell	OLFM4
121	0	3.94754	0.883	0.156	0	SPEM	TFF3
122	0	3.83524	0.781	0.103	0	SPEM	C6orf58
123	0	3.29572	0.993	0.214	0	SPEM	MUC6
124	0	2.83506	0.633	0.064	0	SPEM	IGKV1-5
125	0	2.71709	0.706	0.072	0	SPEM	AC020656.1
126	0	2.28559	0.85	0.14	0	SPEM	AQP5
127	0	2.27108	0.474	0.022	0	SPEM	SOD3
128	0	1.69276	0.377	0.018	0	SPEM	LINC00632
129	1.20189e-251	2.10556	0.613	0.086	3.95314e-247	SPEM	EEF1A1P5
130	2.35611e-242	2.16542	0.586	0.076	7.74947e-238	SPEM	GP2
131	2.32106e-238	1.78908	0.663	0.112	7.6342e-234	SPEM	PPP1R1B
132	1.45795e-235	1.86035	0.584	0.078	4.79535e-231	SPEM	JCHAIN
133	2.89393e-205	2.0985	0.521	0.078	9.51842e-201	SPEM	RARRES2
134	1.08142e-196	2.80176	0.995	0.775	3.55691e-192	SPEM	LYZ
135	2.88277e-194	1.9866	0.885	0.288	9.48173e-190	SPEM	NME2
136	2.79037e-189	1.85896	0.948	0.352	9.17781e-185	SPEM	RACK1
137	6.19182e-183	1.76148	0.743	0.172	2.03655e-178	SPEM	LRRC75A-AS1
138	3.28158e-179	1.8012	0.633	0.135	1.07935e-174	SPEM	C16orf89
139	6.43484e-179	2.16445	0.349	0.034	2.11648e-174	SPEM	IGHV4-34
140	6.40684e-176	1.72095	0.92	0.25	2.10727e-171	SPEM	MT-RNR2
141	5.22266e-174	2.85062	0.252	0.016	1.71779e-169	SPEM	SCGB3A1
142	1.97337e-172	1.69432	0.87	0.278	6.49062e-168	SPEM	ATP5MC2
143	1.91123e-135	1.73335	0.753	0.222	6.28622e-131	SPEM	REG1A
144	3.17288e-134	1.70107	0.923	0.502	1.04359e-129	SPEM	S100A10
145	9.46973e-124	2.08885	0.314	0.041	3.11469e-119	SPEM	IGHA1
146	5.75699e-113	1.78271	0.945	0.657	1.89353e-108	SPEM	GOLM1
147	7.59675e-98	2.01865	0.641	0.234	2.49865e-93	SPEM	ZG16B
148	3.6439e-56	1.7279	0.945	0.854	1.19851e-51	SPEM	TFF2
149	6.72909e-43	2.42485	0.175	0.035	2.21326e-38	SPEM	IGLV1-44
150	4.10642e-34	1.79065	0.185	0.048	1.35064e-29	SPEM	AC090498.1
151	0	7.74422	0.953	0.029	0	IM	SPINK4
152	0	6.56268	0.899	0.019	0	IM	MUC2
153	0	5.22926	0.838	0.027	0	IM	ITLN1
154	0	5.19887	0.595	0.004	0	IM	CLCA1
155	0	4.5221	0.588	0.018	0	IM	ZG16
156	0	2.82486	0.797	0.029	0	IM	KLK1
157	0	1.62627	0.622	0.018	0	IM	HEPACAM2
158	3.57705e-252	5.47618	0.939	0.104	1.17653e-247	IM	REG4
159	1.11426e-244	1.99781	0.743	0.059	3.66491e-240	IM	LRRC26
160	1.31401e-221	1.60702	0.669	0.045	4.32191e-217	IM	FABP2
161	2.11077e-197	2.21795	0.838	0.089	6.94253e-193	IM	CLDN3
162	5.92508e-191	5.11481	1	0.178	1.94882e-186	IM	TFF3
163	2.51276e-156	1.56667	0.541	0.044	8.26471e-152	IM	MUC4
164	3.21608e-122	1.70057	0.838	0.14	1.0578e-117	IM	CAMK2N1
165	3.63957e-111	1.55792	0.791	0.136	1.19709e-106	IM	CLDN7
166	1.96742e-108	1.99412	0.615	0.086	6.47103e-104	IM	HES6
167	6.27931e-101	1.96665	0.953	0.226	2.06533e-96	IM	CLDN4
168	2.39598e-94	2.02171	0.818	0.218	7.88061e-90	IM	ST6GALNAC1
169	6.12982e-89	3.79227	0.973	0.453	2.01616e-84	IM	FCGBP
170	1.00053e-83	1.9815	0.98	0.27	3.29083e-79	IM	MT-RNR2
171	7.03563e-81	1.61661	0.973	0.267	2.31409e-76	IM	MT-RNR1
172	1.16971e-79	2.48965	0.709	0.16	3.84729e-75	IM	WFDC2
173	1.91398e-74	1.72356	0.784	0.19	6.29526e-70	IM	LRRC75A-AS1
174	1.03313e-67	1.90042	0.892	0.372	3.39806e-63	IM	CDC42EP5
175	4.52845e-61	2.83473	0.946	0.681	1.48945e-56	IM	LGALS4
176	1.08031e-55	1.78279	0.851	0.311	3.55326e-51	IM	NR4A1
177	1.0697e-52	1.75528	0.946	0.746	3.51834e-48	IM	SH3BGRL3
178	1.086e-52	2.83427	0.142	0.009	3.57196e-48	IM	PRSS2
179	1.4327e-22	1.7325	0.284	0.068	4.71229e-18	IM	IGKV4-1
180	2.35384e-10	2.02244	0.216	0.077	7.74203e-06	IM	FP671120.1
181	0	6.03672	0.436	0.016	0	Enterocyte	APOA4
182	0	5.73143	0.464	0.04	0	Enterocyte	APOA1
183	0	5.46084	0.661	0.026	0	Enterocyte	FABP1
184	0	4.90736	0.783	0.02	0	Enterocyte	ANPEP
185	0	4.50995	0.336	0.009	0	Enterocyte	APOC3
186	0	4.43065	0.723	0.033	0	Enterocyte	PRAP1
187	0	4.39313	0.416	0.01	0	Enterocyte	RBP2
188	0	4.0436	0.618	0.027	0	Enterocyte	ALDOB
189	0	3.77235	0.576	0.03	0	Enterocyte	PCK1
190	0	3.66849	0.65	0.079	0	Enterocyte	RF00100.4
191	0	3.38885	0.978	0.219	0	Enterocyte	MT-RNR1
192	0	3.27702	0.484	0.019	0	Enterocyte	FABP2
193	0	3.0084	0.387	0.005	0	Enterocyte	APOB
194	0	2.89834	0.991	0.221	0	Enterocyte	MT-RNR2
195	0	2.75044	0.402	0.003	0	Enterocyte	CYP3A4
196	0	2.29028	0.385	0.004	0	Enterocyte	C3orf85
197	0	2.27316	0.317	0.002	0	Enterocyte	TMPRSS15
198	0	2.24541	0.536	0.065	0	Enterocyte	CLDN3
199	0	2.19627	0.361	0.009	0	Enterocyte	SLC6A19
200	2.32664e-306	2.59324	0.428	0.043	7.65255e-302	Enterocyte	SLC5A1
201	2.60867e-306	2.2007	0.613	0.107	8.58019e-302	Enterocyte	CLDN7
202	4.0651e-256	5.43049	0.411	0.049	1.33705e-251	Enterocyte	FP236383.1
203	7.86913e-243	3.73532	0.407	0.05	2.58823e-238	Enterocyte	FP671120.1
204	1.94944e-221	2.37139	0.569	0.124	6.41189e-217	Enterocyte	MUC17
205	9.85538e-218	2.71196	0.345	0.039	3.24153e-213	Enterocyte	RPL41P1
206	7.44647e-184	2.70653	0.643	0.23	2.44922e-179	Enterocyte	CDHR5
207	6.39372e-144	2.77195	0.362	0.069	2.10296e-139	Enterocyte	IGKV1-5
208	1.38158e-125	2.38444	0.485	0.161	4.54414e-121	Enterocyte	SELENOP
209	4.35016e-108	2.44917	0.297	0.06	1.43081e-103	Enterocyte	IGLV2-14
210	3.51714e-105	2.19958	0.616	0.308	1.15682e-100	Enterocyte	ADIRF
211	0	6.25405	0.737	0.041	0	Endocrine	CHGA
212	0	5.97728	0.905	0.022	0	Endocrine	PCSK1N
213	0	3.75109	0.658	0.004	0	Endocrine	CHGB
214	0	3.72022	0.77	0.03	0	Endocrine	SCG5
215	0	3.61184	0.473	0.012	0	Endocrine	TTR
216	0	3.4334	0.724	0.036	0	Endocrine	TUBA1A
217	0	3.18114	0.642	0.006	0	Endocrine	CPE
218	0	2.91344	0.498	0.003	0	Endocrine	CRYBA2
219	0	2.72828	0.313	0.001	0	Endocrine	SHISAL2B
220	0	2.66799	0.79	0.073	0	Endocrine	MS4A8
221	0	2.59095	0.654	0.015	0	Endocrine	CACNA1A
222	0	2.38314	0.671	0.002	0	Endocrine	SCG3
223	0	2.36035	0.601	0.011	0	Endocrine	SCGN
224	0	2.27388	0.543	0.001	0	Endocrine	FEV
225	0	2.09488	0.305	0.004	0	Endocrine	HAP1
226	3.1643e-273	2.8897	0.671	0.065	1.04077e-268	Endocrine	ERO1B
227	1.41958e-248	2.3548	0.267	0.007	4.66914e-244	Endocrine	CES1
228	7.22425e-248	2.43479	0.23	0.004	2.37613e-243	Endocrine	TPH1
229	1.9261e-127	4.18102	0.226	0.013	6.33512e-123	Endocrine	RBP4
230	3.06403e-112	2.10049	0.535	0.103	1.00779e-107	Endocrine	PAM
231	5.06659e-107	2.75776	0.626	0.15	1.66645e-102	Endocrine	DEPP1
232	1.73308e-71	8.57484	0.321	0.055	5.70027e-67	Endocrine	GAST
233	2.75894e-66	2.04643	0.844	0.442	9.07444e-62	Endocrine	MDK
234	9.82506e-59	2.04541	0.523	0.154	3.23156e-54	Endocrine	C2CD4B
235	9.51657e-55	2.08132	0.519	0.16	3.13009e-50	Endocrine	CDKN1C
236	9.86772e-55	2.22985	0.798	0.481	3.24559e-50	Endocrine	BTG2
237	6.98455e-46	2.15305	0.646	0.31	2.29729e-41	Endocrine	NR4A1
238	3.32172e-35	2.05783	0.494	0.197	1.09255e-30	Endocrine	RASD1
239	8.99541e-12	2.04377	0.111	0.031	2.95868e-07	Endocrine	IGLV2-11
240	4.97008e-11	2.04734	0.3	0.174	1.63471e-06	Endocrine	SCGB2A1
241	0	6.2469	0.964	0.015	0	Parietal cell	GIF
242	0	6.01458	0.936	0.007	0	Parietal cell	ATP4B
243	0	4.2277	0.791	0.004	0	Parietal cell	ATP4A
244	0	3.62704	0.709	0.029	0	Parietal cell	G0S2
245	0	2.88511	0.573	0.002	0	Parietal cell	CPA2
246	2.44038e-144	3.43126	0.945	0.159	8.02666e-140	Parietal cell	SLC25A4
247	1.52119e-143	6.17569	1	0.195	5.00334e-139	Parietal cell	CKB
248	2.7708e-135	4.16922	0.973	0.19	9.11344e-131	Parietal cell	IDH2
249	6.13959e-114	4.09017	0.973	0.241	2.01937e-109	Parietal cell	KCNE2
250	7.35108e-108	3.87481	0.982	0.269	2.41784e-103	Parietal cell	LDHB
251	7.66003e-101	3.14516	0.909	0.223	2.51946e-96	Parietal cell	MPC1
252	2.02228e-93	3.14826	0.955	0.277	6.65149e-89	Parietal cell	GSTA1
253	4.19036e-92	3.35298	0.918	0.264	1.37825e-87	Parietal cell	MDH1
254	1.50849e-79	3.06582	0.882	0.274	4.96157e-75	Parietal cell	GHITM
255	3.48984e-76	3.25769	0.973	0.459	1.14784e-71	Parietal cell	AKR7A3
256	4.02706e-74	3.70803	0.982	0.543	1.32454e-69	Parietal cell	SLC25A5
257	6.25436e-73	3.19289	0.982	0.559	2.05712e-68	Parietal cell	NDUFA4
258	1.53692e-70	3.44532	0.955	0.432	5.05508e-66	Parietal cell	ALDH1A1
259	1.48537e-68	3.10535	0.927	0.397	4.88554e-64	Parietal cell	CYCS
260	1.01295e-65	2.88762	0.973	0.538	3.33169e-61	Parietal cell	UQCRB
261	1.77828e-64	2.96612	0.936	0.507	5.84895e-60	Parietal cell	COX5A
262	6.05967e-64	3.11835	0.973	0.652	1.99309e-59	Parietal cell	UQCRQ
263	3.95808e-61	3.1686	0.945	0.601	1.30185e-56	Parietal cell	COX7A2
264	7.05343e-60	3.08031	0.927	0.58	2.31994e-55	Parietal cell	COX7B
265	7.45211e-41	2.95395	0.591	0.182	2.45107e-36	Parietal cell	ATP5A1
266	2.99904e-39	3.32037	0.609	0.21	9.86414e-35	Parietal cell	ATP5J
267	1.90937e-38	2.91129	0.591	0.195	6.2801e-34	Parietal cell	ATP5G1
268	1.78984e-37	3.78268	0.609	0.223	5.88696e-33	Parietal cell	ATP5G3
269	4.47919e-37	3.32495	0.582	0.196	1.47325e-32	Parietal cell	ATP5B
270	2.11106e-31	3.06354	0.6	0.243	6.94349e-27	Parietal cell	USMG5
