# Supplementary material for: Single-cell dissection of prognostic architecture and immunotherap response in Helicobacter pylori infection-associated gastric cancer
Source: eLife. 2025 Jun 17;13:RP99337. doi: 10.7554/eLife.99337 (PMC12173458; doi:10.7554/eLife.99337)
Supplement: Supplementary file 4. [file elife-99337-supp4.xlsx]

## Sheet: Table S4
Supplementary Table S4 DEGs of T/NK subclusters
	p_val	avg_log2FC	pct.1	pct.2	p_val_adj	cluster	gene
1	0	0.882161	0.157	0.001	0	ILC	PCDH9
2	8.19531e-306	0.968271	0.142	0.002	2.41712e-301	ILC	TNFSF11
3	5.58822e-300	1.65847	0.331	0.015	1.64819e-295	ILC	KIT
4	2.81688e-249	1.3621	0.394	0.026	8.30809e-245	ILC	KRT81
5	1.21169e-213	1.7637	0.63	0.077	3.57377e-209	ILC	FCER1G
6	2.95822e-205	1.61276	0.484	0.049	8.72497e-201	ILC	KRT86
7	9.56118e-171	0.941361	0.331	0.027	2.81998e-166	ILC	FES
8	6.69536e-157	1.65719	0.669	0.112	1.97473e-152	ILC	TYROBP
9	6.90722e-149	0.875041	0.299	0.025	2.03722e-144	ILC	B3GNT7
10	2.95424e-141	1.04811	0.362	0.039	8.71324e-137	ILC	SH2D1B
11	8.58398e-141	1.32257	0.378	0.043	2.53176e-136	ILC	GSN
12	2.33209e-135	0.890488	0.343	0.036	6.87827e-131	ILC	CXXC5
13	5.81098e-117	1.49498	0.701	0.166	1.71389e-112	ILC	TMIGD2
14	9.49554e-114	2.68913	0.717	0.192	2.80061e-109	ILC	AREG
15	1.19832e-97	1.07728	0.283	0.034	3.53434e-93	ILC	SPINK2
16	2.39204e-83	1.69874	0.303	0.046	7.05507e-79	ILC	LST1
17	4.37361e-81	1.95711	0.602	0.164	1.28995e-76	ILC	XCL1
18	6.5712e-65	1.0877	0.374	0.078	1.93811e-60	ILC	CD160
19	9.16079e-65	0.878341	0.429	0.099	2.70188e-60	ILC	TXK
20	2.00299e-63	1.02164	0.26	0.043	5.90761e-59	ILC	TLE1
21	3.5819e-63	1.02592	0.307	0.056	1.05645e-58	ILC	TRDC
22	4.11826e-62	1.33498	0.732	0.29	1.21464e-57	ILC	MAP3K8
23	8.77762e-59	1.12436	0.453	0.12	2.58887e-54	ILC	ENTPD1
24	1.36435e-58	0.986765	0.5	0.139	4.02402e-54	ILC	SLC16A3
25	2.16768e-57	0.885269	0.382	0.089	6.39336e-53	ILC	ZBTB16
26	3.71454e-57	1.73156	0.626	0.22	1.09557e-52	ILC	XCL2
27	1.30571e-56	1.17728	0.236	0.039	3.85107e-52	ILC	IL4I1
28	1.48057e-53	0.912719	0.35	0.08	4.36681e-49	ILC	MAFF
29	1.80432e-49	1.36125	0.661	0.283	5.32167e-45	ILC	LDLRAD4
30	1.67516e-46	0.930758	0.598	0.219	4.94072e-42	ILC	TNFRSF18
31	4.36057e-36	1.04017	0.543	0.225	1.28611e-31	ILC	TIPARP
32	4.8556e-36	0.881527	0.343	0.101	1.43211e-31	ILC	KLRC2
33	5.50693e-36	1.23251	0.764	0.47	1.62422e-31	ILC	NR4A2
34	8.33551e-36	0.891937	0.449	0.163	2.45848e-31	ILC	NSMCE1
35	3.72234e-35	1.12928	0.681	0.349	1.09787e-30	ILC	ZNF331
36	8.50781e-35	0.887706	0.602	0.261	2.50929e-30	ILC	SCML4
37	4.09468e-34	1.15327	0.52	0.206	1.20769e-29	ILC	NR4A1
38	1.17488e-32	0.893849	0.378	0.129	3.46518e-28	ILC	CAT
39	4.43642e-31	0.895352	0.528	0.235	1.30848e-26	ILC	MPG
40	1.86167e-29	1.28328	0.823	0.577	5.49081e-25	ILC	ZFP36L1
41	5.64038e-26	0.908114	0.685	0.414	1.66357e-21	ILC	FAM177A1
42	3.4971e-25	0.882204	0.898	0.598	1.03143e-20	ILC	FOS
43	1.99902e-24	0.90322	0.52	0.259	5.89591e-20	ILC	PFKFB3
44	2.39364e-24	0.997196	0.846	0.819	7.05981e-20	ILC	CD7
45	5.01406e-23	1.00239	0.291	0.104	1.47885e-18	ILC	CD83
46	1.72502e-16	0.889793	0.701	0.449	5.08778e-12	ILC	ID2
47	6.87382e-15	0.940138	0.165	0.054	2.02737e-10	ILC	SOX4
48	3.3332e-14	1.13947	0.417	0.234	9.83095e-10	ILC	IGKV1-5
49	5.45243e-11	0.906143	0.528	0.409	1.60814e-06	ILC	EEF1A1P5
50	1.29105e-10	1.062	0.189	0.08	3.80783e-06	ILC	MIR24-2
51	0	3.47264	0.922	0.041	0	NK1	FCER1G
52	0	3.21558	0.943	0.078	0	NK1	TYROBP
53	0	3.08233	0.895	0.516	0	NK1	GZMA
54	0	3.03916	0.686	0.19	0	NK1	GNLY
55	0	2.4679	0.775	0.17	0	NK1	AREG
56	0	2.18927	0.612	0.031	0	NK1	TRDC
57	0	2.09898	0.717	0.081	0	NK1	KIR2DL4
58	0	1.93866	0.567	0.028	0	NK1	KRT86
59	0	1.86101	0.992	0.81	0	NK1	CD7
60	0	1.84404	0.791	0.195	0	NK1	TNFRSF18
61	0	1.83024	0.917	0.508	0	NK1	GSTP1
62	0	1.80612	0.711	0.145	0	NK1	TMIGD2
63	0	1.76292	0.892	0.469	0	NK1	CD247
64	0	1.74873	0.679	0.192	0	NK1	CLIC3
65	0	1.66414	0.857	0.314	0	NK1	HOPX
66	0	1.62168	0.567	0.016	0	NK1	SH2D1B
67	0	1.61058	0.433	0.01	0	NK1	KRT81
68	0	1.60427	0.492	0.061	0	NK1	CD160
69	0	1.52619	0.566	0.036	0	NK1	LAT2
70	0	1.45862	0.615	0.12	0	NK1	SLC16A3
71	0	1.41774	0.549	0.103	0	NK1	ENTPD1
72	0	1.29675	0.678	0.169	0	NK1	MATK
73	0	1.26842	0.563	0.079	0	NK1	TXK
74	0	1.26384	0.384	0.011	0	NK1	B3GNT7
75	0	1.10684	0.379	0.025	0	NK1	IRF8
76	0	1.08654	0.455	0.056	0	NK1	MCTP2
77	0	1.06769	0.377	0.019	0	NK1	FGR
78	0	1.05521	0.322	0.003	0	NK1	ADGRG3
79	7.85154e-294	1.38274	0.748	0.242	2.31573e-289	NK1	IL2RB
80	1.72495e-272	1.37735	0.764	0.272	5.08757e-268	NK1	MAP3K8
81	1.93152e-267	1.40077	0.693	0.212	5.69684e-263	NK1	CEBPD
82	3.11758e-242	1.07771	0.425	0.087	9.19498e-238	NK1	KLRC2
83	7.50439e-229	1.30883	0.878	0.412	2.21335e-224	NK1	PRF1
84	2.69476e-215	1.14378	0.881	0.46	7.94792e-211	NK1	CD63
85	1.86437e-212	1.09132	0.349	0.068	5.49878e-208	NK1	GEM
86	4.03399e-202	1.19842	0.719	0.277	1.18979e-197	NK1	FOSL2
87	4.1367e-202	1.06249	0.961	0.546	1.22008e-197	NK1	NKG7
88	1.7456e-193	1.22227	0.951	0.663	5.14848e-189	NK1	CCL5
89	2.22845e-173	1.20107	0.703	0.286	6.5726e-169	NK1	KLRD1
90	1.61909e-172	1.19403	0.351	0.083	4.77534e-168	NK1	PLPP1
91	3.0628e-172	1.35027	0.747	0.34	9.03341e-168	NK1	CTSW
92	3.58552e-169	1.08429	0.745	0.334	1.05751e-164	NK1	CAPG
93	2.8667e-152	1.151	0.852	0.422	8.45505e-148	NK1	GZMB
94	4.72407e-148	1.3235	0.489	0.168	1.39332e-143	NK1	KLRC1
95	2.28178e-136	1.10048	0.623	0.27	6.72988e-132	NK1	LDLRAD4
96	1.39485e-118	1.10332	0.53	0.205	4.11397e-114	NK1	GZMK
97	1.13535e-98	1.07679	0.337	0.109	3.3486e-94	NK1	CCL3
98	7.63613e-84	1.14249	0.479	0.212	2.2522e-79	NK1	XCL2
99	1.88398e-75	1.15222	0.383	0.159	5.55662e-71	NK1	XCL1
100	1.07397e-11	1.1607	0.326	0.232	3.16757e-07	NK1	IGKV1-5
101	0	2.90881	0.58	0.005	0	NK2	FGFBP2
102	0	2.65056	0.647	0.026	0	NK2	FCGR3A
103	0	2.57496	0.938	0.188	0	NK2	GNLY
104	0	2.30154	0.999	0.551	0	NK2	NKG7
105	0	2.28484	0.689	0.099	0	NK2	TYROBP
106	0	1.98446	0.889	0.305	0	NK2	GZMH
107	0	1.76981	0.414	0.013	0	NK2	KLRF1
108	0	1.5447	0.374	0.009	0	NK2	S1PR5
109	0	1.38011	0.155	0.004	0	NK2	MYOM2
110	0	1.05489	0.242	0.009	0	NK2	PRSS23
111	0	0.924845	0.171	0.001	0	NK2	CX3CR1
112	6.62327e-266	1.73615	0.839	0.287	1.95347e-261	NK2	KLRD1
113	8.2488e-246	1.88292	0.902	0.418	2.4329e-241	NK2	PRF1
114	2.68514e-237	1.37269	0.399	0.067	7.91954e-233	NK2	PLEK
115	7.73698e-220	1.60793	0.957	0.601	2.28195e-215	NK2	CST7
116	6.80655e-218	0.951619	0.239	0.025	2.00752e-213	NK2	C1orf21
117	2.011e-210	1.4898	0.935	0.426	5.93124e-206	NK2	GZMB
118	4.23839e-204	1.59472	0.82	0.343	1.25007e-199	NK2	CTSW
119	2.29303e-182	1.00106	0.26	0.036	6.76305e-178	NK2	CD300A
120	1.68086e-176	1.65775	0.732	0.267	4.95752e-172	NK2	KLF2
121	2.26017e-176	0.970327	0.153	0.012	6.66614e-172	NK2	KIR3DL1
122	2.59367e-158	0.994414	0.252	0.038	7.64976e-154	NK2	ADRB2
123	3.99624e-155	1.89895	0.524	0.176	1.17865e-150	NK2	SPON2
124	2.33291e-142	0.854659	0.155	0.016	6.88067e-138	NK2	KIR2DS4
125	5.12568e-141	0.955037	0.252	0.043	1.51177e-136	NK2	ADGRG1
126	4.6583e-133	1.3438	0.666	0.318	1.37392e-128	NK2	EFHD2
127	1.41442e-129	1.13593	0.38	0.1	4.17169e-125	NK2	PLAC8
128	3.09692e-129	0.861072	0.242	0.042	9.13405e-125	NK2	FCRL6
129	3.35728e-112	2.4021	0.377	0.111	9.90195e-108	NK2	CCL3
130	1.75628e-105	1.12573	0.906	0.525	5.17998e-101	NK2	CCL4
131	1.82011e-100	1.11304	0.685	0.37	5.36825e-96	NK2	LITAF
132	3.61907e-89	1.34132	0.494	0.206	1.06741e-84	NK2	CLIC3
133	4.25605e-81	1.20656	0.658	0.413	1.25528e-76	NK2	ITGB2
134	1.81424e-78	0.984621	0.386	0.144	5.35093e-74	NK2	TBX21
135	1.35217e-76	1.06117	0.494	0.225	3.98809e-72	NK2	ZEB2
136	1.5261e-73	1.10625	0.588	0.335	4.50109e-69	NK2	FLNA
137	3.70995e-69	1.21632	0.429	0.191	1.09421e-64	NK2	CMC1
138	7.55745e-63	0.982474	0.54	0.298	2.22899e-58	NK2	XBP1
139	4.97699e-62	0.896845	0.256	0.077	1.46791e-57	NK2	FCER1G
140	7.696e-62	0.905146	0.465	0.232	2.26986e-57	NK2	APMAP
141	1.99259e-61	0.903249	0.347	0.139	5.87695e-57	NK2	UPP1
142	5.36453e-61	1.0134	0.501	0.251	1.58221e-56	NK2	METRNL
143	5.49104e-58	0.878947	0.689	0.482	1.61953e-53	NK2	CD247
144	2.84259e-57	0.904738	0.406	0.188	8.38393e-53	NK2	ITGB1
145	1.69511e-56	0.863884	0.62	0.404	4.99957e-52	NK2	ABHD17A
146	1.41644e-40	1.55212	0.242	0.091	4.17764e-36	NK2	HSPA6
147	2.86067e-34	0.865893	0.419	0.243	8.43726e-30	NK2	GADD45B
148	1.85367e-24	1.13325	0.255	0.132	5.4672e-20	NK2	RHOB
149	2.20524e-16	0.863564	0.524	0.402	6.50414e-12	NK2	HSPA1A
150	5.32193e-07	0.875335	0.263	0.197	0.0156965	NK2	AREG
151	0	3.56269	0.953	0.141	0	CD8_MKI67	STMN1
152	0	3.04834	0.978	0.544	0	CD8_MKI67	TUBA1B
153	0	2.85799	0.946	0.433	0	CD8_MKI67	TUBB
154	0	2.49729	0.742	0.022	0	CD8_MKI67	TYMS
155	0	2.22752	0.966	0.505	0	CD8_MKI67	HMGN2
156	0	2.21579	0.698	0.02	0	CD8_MKI67	MKI67
157	0	2.195	0.589	0.009	0	CD8_MKI67	UBE2C
158	0	1.92395	0.4	0.015	0	CD8_MKI67	HIST1H1B
159	0	1.80267	0.624	0.045	0	CD8_MKI67	NUSAP1
160	0	1.74185	0.555	0.013	0	CD8_MKI67	TOP2A
161	0	1.73461	0.563	0.028	0	CD8_MKI67	CENPF
162	0	1.6977	0.543	0.006	0	CD8_MKI67	RRM2
163	0	1.54466	0.631	0.05	0	CD8_MKI67	CKS1B
164	0	1.54228	0.49	0.008	0	CD8_MKI67	ASPM
165	0	1.5357	0.364	0.035	0	CD8_MKI67	HIST1H2AI
166	0	1.52455	0.572	0.023	0	CD8_MKI67	TPX2
167	0	1.51564	0.589	0.016	0	CD8_MKI67	TK1
168	0	1.48065	0.61	0.101	0	CD8_MKI67	PCNA
169	0	1.45742	0.568	0.023	0	CD8_MKI67	CDK1
170	0	1.45109	0.425	0.005	0	CD8_MKI67	CDC20
171	0	1.44825	0.501	0.012	0	CD8_MKI67	PCLAF
172	0	1.44035	0.602	0.06	0	CD8_MKI67	MCM7
173	0	1.4402	0.557	0.019	0	CD8_MKI67	CDKN3
174	0	1.38938	0.658	0.072	0	CD8_MKI67	CENPM
175	0	1.36351	0.608	0.012	0	CD8_MKI67	ZWINT
176	0	1.36052	0.734	0.149	0	CD8_MKI67	SMC4
177	0	1.27043	0.462	0.006	0	CD8_MKI67	CCNB2
178	0	1.25788	0.479	0.005	0	CD8_MKI67	BIRC5
179	0	1.25684	0.644	0.085	0	CD8_MKI67	TMEM106C
180	8.09417e-286	2.13741	0.964	0.519	2.38729e-281	CD8_MKI67	HMGB2
181	2.14414e-275	1.47267	1	0.951	6.32393e-271	CD8_MKI67	GAPDH
182	1.87486e-267	1.98238	0.964	0.587	5.5297e-263	CD8_MKI67	H2AFZ
183	3.86165e-264	1.7295	0.829	0.272	1.13895e-259	CD8_MKI67	DUT
184	1.88189e-263	1.54009	0.784	0.211	5.55044e-259	CD8_MKI67	FABP5
185	2.4301e-263	1.44603	0.751	0.194	7.16734e-259	CD8_MKI67	PTTG1
186	1.71285e-241	1.58381	0.986	0.804	5.05187e-237	CD8_MKI67	HMGB1
187	3.7184e-232	1.2769	0.75	0.201	1.09671e-227	CD8_MKI67	CKS2
188	1.78818e-221	1.31319	0.781	0.237	5.27406e-217	CD8_MKI67	TMPO
189	2.89335e-218	1.26258	0.83	0.282	8.53366e-214	CD8_MKI67	RANBP1
190	2.7935e-203	1.51653	0.921	0.479	8.23915e-199	CD8_MKI67	H2AFV
191	3.64358e-202	1.37251	0.969	0.615	1.07464e-197	CD8_MKI67	TPI1
192	1.61808e-199	1.59373	0.767	0.263	4.77236e-195	CD8_MKI67	HLA-DRA
193	5.9062e-170	1.40839	0.932	0.472	1.74198e-165	CD8_MKI67	MT2A
194	3.34536e-151	1.25871	0.802	0.335	9.8668e-147	CD8_MKI67	TUBB4B
195	1.49499e-147	2.7544	0.835	0.461	4.40932e-143	CD8_MKI67	HIST1H4C
196	6.28566e-143	1.38472	0.561	0.165	1.85389e-138	CD8_MKI67	HIST1H1C
197	1.00836e-133	1.35124	0.827	0.402	2.97406e-129	CD8_MKI67	HLA-DRB1
198	7.73389e-130	1.47109	0.359	0.079	2.28103e-125	CD8_MKI67	CXCL13
199	1.50784e-122	1.44219	0.76	0.362	4.44722e-118	CD8_MKI67	UBE2S
200	4.04575e-74	1.66878	0.589	0.276	1.19325e-69	CD8_MKI67	HIST1H1E
201	0	1.79188	0.9	0.378	0	CD8_CXCL13	GZMB
202	0	1.74719	0.706	0.261	0	CD8_CXCL13	LAG3
203	0	1.74646	0.318	0.055	0	CD8_CXCL13	CXCL13
204	0	1.71139	0.427	0.107	0	CD8_CXCL13	LINC02446
205	0	1.6545	0.779	0.26	0	CD8_CXCL13	GZMH
206	0	1.6288	0.334	0.029	0	CD8_CXCL13	VCAM1
207	0	1.57739	0.529	0.169	0	CD8_CXCL13	GNLY
208	0	1.48205	0.951	0.511	0	CD8_CXCL13	NKG7
209	0	1.45231	0.811	0.358	0	CD8_CXCL13	HLA-DRB1
210	0	1.38258	0.735	0.244	0	CD8_CXCL13	KLRD1
211	0	1.32929	0.78	0.385	0	CD8_CXCL13	PRF1
212	0	1.32231	0.408	0.085	0	CD8_CXCL13	HAVCR2
213	0	1.20481	0.379	0.074	0	CD8_CXCL13	KIR2DL4
214	0	1.19764	0.983	0.632	0	CD8_CXCL13	CCL5
215	0	1.17229	0.786	0.401	0	CD8_CXCL13	HLA-DPA1
216	0	1.08306	0.657	0.295	0	CD8_CXCL13	DUSP4
217	0	1.0136	0.734	0.367	0	CD8_CXCL13	HLA-DPB1
218	0	0.977602	0.775	0.356	0	CD8_CXCL13	CD8A
219	0	0.877371	0.902	0.482	0	CD8_CXCL13	GZMA
220	1.82596e-305	0.941028	0.695	0.305	5.38549e-301	CD8_CXCL13	CD8B
221	1.75097e-286	0.97221	0.333	0.087	5.16432e-282	CD8_CXCL13	TNFRSF9
222	4.50236e-286	1.1152	0.501	0.191	1.32792e-281	CD8_CXCL13	FABP5
223	1.50387e-274	1.15476	0.559	0.239	4.43552e-270	CD8_CXCL13	HLA-DRA
224	9.66845e-268	1.06435	0.706	0.363	2.85161e-263	CD8_CXCL13	HSPA1A
225	4.84532e-266	1.07289	0.492	0.2	1.42908e-261	CD8_CXCL13	LYST
226	1.365e-264	1.00739	0.502	0.204	4.02594e-260	CD8_CXCL13	PTMS
227	1.16897e-256	1.02874	0.464	0.184	3.44775e-252	CD8_CXCL13	ACP5
228	7.94103e-250	0.97397	0.527	0.222	2.34213e-245	CD8_CXCL13	METRNL
229	1.25805e-240	0.876309	0.848	0.58	3.7105e-236	CD8_CXCL13	CST7
230	5.10162e-234	0.838834	0.936	0.789	1.50467e-229	CD8_CXCL13	CD74
231	1.40055e-232	0.926966	0.447	0.171	4.13077e-228	CD8_CXCL13	HLA-DRB5
232	4.46411e-213	0.989087	0.605	0.311	1.31665e-208	CD8_CXCL13	HSPH1
233	5.87056e-211	0.821854	0.725	0.445	1.73146e-206	CD8_CXCL13	CD63
234	3.77834e-202	0.888387	0.27	0.081	1.11438e-197	CD8_CXCL13	SNAP47
235	3.29318e-192	0.787717	0.336	0.117	9.71291e-188	CD8_CXCL13	OASL
236	6.72027e-190	0.766563	0.249	0.07	1.98208e-185	CD8_CXCL13	KLRC3
237	1.47397e-188	0.825943	0.811	0.626	4.34734e-184	CD8_CXCL13	RARRES3
238	1.93343e-188	0.805566	0.438	0.184	5.70246e-184	CD8_CXCL13	CLIC3
239	2.95414e-185	0.800593	0.252	0.073	8.71294e-181	CD8_CXCL13	PLPP1
240	2.78804e-174	0.993436	0.348	0.14	8.22304e-170	CD8_CXCL13	FAM3C
241	3.40712e-173	0.855503	0.397	0.164	1.0049e-168	CD8_CXCL13	HLA-DQA1
242	8.07196e-159	0.789109	0.564	0.306	2.38074e-154	CD8_CXCL13	CXCR6
243	7.14029e-148	0.773208	0.746	0.528	2.10596e-143	CD8_CXCL13	CLEC2B
244	4.49698e-146	0.793256	0.535	0.298	1.32634e-141	CD8_CXCL13	DUSP5
245	4.4811e-142	0.899075	0.284	0.105	1.32166e-137	CD8_CXCL13	CRTAM
246	6.40635e-138	0.878601	0.434	0.228	1.88949e-133	CD8_CXCL13	SRRT
247	1.74707e-132	0.797213	0.519	0.292	5.15281e-128	CD8_CXCL13	TIGIT
248	3.7279e-116	0.857031	0.632	0.436	1.09951e-111	CD8_CXCL13	HSPD1
249	1.5669e-70	0.81358	0.485	0.342	4.62141e-66	CD8_CXCL13	CTSW
250	1.8504e-52	1.16826	0.108	0.039	5.45756e-48	CD8_CXCL13	TRBV28
251	0	3.1175	0.972	0.165	0	CD8_GZMK	GZMK
252	0	1.41775	0.934	0.59	0	CD8_GZMK	CST7
253	5.65528e-294	1.43747	0.92	0.638	1.66797e-289	CD8_GZMK	DUSP2
254	1.90064e-290	1.73556	0.9	0.511	5.60576e-286	CD8_GZMK	CCL4
255	1.30303e-184	1.40283	0.399	0.13	3.84315e-180	CD8_GZMK	TNFSF9
256	3.83716e-170	1.30951	0.452	0.18	1.13173e-165	CD8_GZMK	CMC1
257	4.63234e-170	1.03605	0.933	0.798	1.36626e-165	CD8_GZMK	CD74
258	1.88431e-167	1.52023	0.601	0.284	5.55759e-163	CD8_GZMK	CCL4L2
259	4.3327e-167	0.970995	0.281	0.072	1.27789e-162	CD8_GZMK	KLRG1
260	2.15301e-166	1.10229	0.357	0.111	6.35008e-162	CD8_GZMK	CRTAM
261	2.12111e-154	0.773863	0.865	0.544	6.25602e-150	CD8_GZMK	NKG7
262	1.15361e-137	0.935335	0.669	0.395	3.40246e-133	CD8_GZMK	HLA-DPB1
263	7.43907e-135	1.01853	0.474	0.223	2.19408e-130	CD8_GZMK	SH2D1A
264	2.98133e-114	0.885469	0.414	0.177	8.79315e-110	CD8_GZMK	HLA-DQA1
265	8.33299e-114	0.950953	0.625	0.405	2.45773e-109	CD8_GZMK	GZMM
266	4.36159e-110	0.712785	0.212	0.058	1.28641e-105	CD8_GZMK	EOMES
267	2.86131e-107	0.863169	0.625	0.407	8.43913e-103	CD8_GZMK	ITGB2
268	7.32198e-106	1.10666	0.579	0.377	2.15954e-101	CD8_GZMK	CLDND1
269	7.47141e-99	0.811721	0.657	0.398	2.20362e-94	CD8_GZMK	HLA-DRB1
270	4.51032e-97	0.967555	0.701	0.536	1.33027e-92	CD8_GZMK	TAGAP
271	1.02422e-91	0.830353	0.309	0.127	3.02083e-87	CD8_GZMK	SAMD3
272	2.66034e-86	0.721988	0.911	0.789	7.84641e-82	CD8_GZMK	CXCR4
273	1.82233e-85	0.75608	0.643	0.435	5.37479e-81	CD8_GZMK	HLA-DPA1
274	8.26084e-76	0.677967	0.226	0.083	2.43645e-71	CD8_GZMK	DTHD1
275	2.14193e-75	0.967434	0.375	0.193	6.31742e-71	CD8_GZMK	HLA-DRB5
276	2.20676e-72	0.794675	0.523	0.311	6.5086e-68	CD8_GZMK	GZMH
277	6.30672e-65	0.919358	0.291	0.134	1.8601e-60	CD8_GZMK	TNF
278	2.27188e-63	0.832751	0.467	0.269	6.70068e-59	CD8_GZMK	KLF2
279	2.78127e-62	0.742296	0.348	0.181	8.20309e-58	CD8_GZMK	HLA-DQB1
280	8.12768e-61	0.697356	0.643	0.507	2.39718e-56	CD8_GZMK	CD81
281	1.30666e-60	0.762173	0.394	0.231	3.85385e-56	CD8_GZMK	TRAT1
282	4.93858e-59	0.582771	0.188	0.071	1.45658e-54	CD8_GZMK	PLEK
283	1.3452e-58	0.540796	0.736	0.614	3.96752e-54	CD8_GZMK	CD44
284	2.09615e-57	0.696898	0.229	0.096	6.18239e-53	CD8_GZMK	CCL3L1
285	5.1074e-49	0.841891	0.394	0.253	1.50638e-44	CD8_GZMK	ITM2C
286	2.33885e-45	0.662273	0.317	0.182	6.8982e-41	CD8_GZMK	LYAR
287	1.53017e-44	0.692874	0.531	0.401	4.51307e-40	CD8_GZMK	PIK3R1
288	1.82348e-43	0.548542	0.633	0.51	5.37817e-39	CD8_GZMK	IER2
289	9.30216e-41	0.846063	0.239	0.12	2.74358e-36	CD8_GZMK	IFNG
290	1.58271e-40	0.582415	0.238	0.124	4.66805e-36	CD8_GZMK	F2R
291	3.1048e-38	0.620487	0.254	0.138	9.15731e-34	CD8_GZMK	LINC00861
292	9.68021e-37	0.545004	0.462	0.324	2.85508e-32	CD8_GZMK	CD27
293	5.33885e-36	0.593498	0.558	0.454	1.57464e-31	CD8_GZMK	TUBA4A
294	1.80018e-33	0.608606	0.399	0.27	5.30946e-29	CD8_GZMK	HLA-DRA
295	5.75841e-32	0.556648	0.138	0.06	1.69838e-27	CD8_GZMK	IGLV7-46
296	3.80028e-31	0.558843	0.424	0.313	1.12085e-26	CD8_GZMK	APOBEC3G
297	8.46434e-28	0.603111	0.34	0.242	2.49647e-23	CD8_GZMK	NFATC2
298	1.60335e-22	0.925449	0.178	0.101	4.72892e-18	CD8_GZMK	IGLV1-44
299	2.08544e-13	0.589472	0.133	0.08	6.1508e-09	CD8_GZMK	IGLV2-11
300	2.98748e-09	1.08845	0.131	0.087	8.81126e-05	CD8_GZMK	IGLV6-57
301	0	3.16771	0.488	0.072	0	CD8_IFNG	HSPA6
302	0	2.89125	0.953	0.273	0	CD8_IFNG	HSPA1B
303	0	2.6063	0.978	0.636	0	CD8_IFNG	DNAJB1
304	0	2.44018	0.967	0.37	0	CD8_IFNG	HSPA1A
305	0	2.34529	0.219	0.021	0	CD8_IFNG	PGA3
306	0	1.99364	0.983	0.877	0	CD8_IFNG	HSP90AA1
307	5.07972e-290	1.72906	0.969	0.882	1.49821e-285	CD8_IFNG	HSPA8
308	9.00262e-288	2.08355	0.748	0.322	2.65523e-283	CD8_IFNG	HSPH1
309	3.10065e-265	1.85988	0.86	0.56	9.14506e-261	CD8_IFNG	HSPE1
310	3.76124e-250	1.68608	0.713	0.28	1.10934e-245	CD8_IFNG	CCL4L2
311	7.42689e-237	1.47119	0.595	0.197	2.19049e-232	CD8_IFNG	GZMK
312	1.05892e-207	1.5582	0.889	0.628	3.12316e-203	CD8_IFNG	JUN
313	5.89639e-190	1.28779	0.348	0.09	1.73908e-185	CD8_IFNG	DNAJB4
314	1.45516e-185	1.91497	0.498	0.191	4.29184e-181	CD8_IFNG	NR4A1
315	5.8473e-167	1.33683	0.871	0.644	1.7246e-162	CD8_IFNG	DUSP2
316	7.05904e-167	1.7437	0.427	0.147	2.08199e-162	CD8_IFNG	BAG3
317	5.23303e-166	1.92426	0.373	0.113	1.54343e-161	CD8_IFNG	IFNG
318	4.515e-161	1.31827	0.297	0.076	1.33166e-156	CD8_IFNG	DNAJA4
319	2.65828e-151	1.50795	0.767	0.561	7.84033e-147	CD8_IFNG	DNAJA1
320	3.45188e-151	1.63523	0.708	0.445	1.0181e-146	CD8_IFNG	HSPD1
321	1.53707e-149	1.50371	0.678	0.409	4.53343e-145	CD8_IFNG	HSPB1
322	2.82285e-143	1.79417	0.369	0.127	8.32571e-139	CD8_IFNG	ZFAND2A
323	5.40978e-138	0.920467	0.952	0.829	1.59556e-133	CD8_IFNG	JUND
324	3.02987e-130	1.25066	0.68	0.424	8.93631e-126	CD8_IFNG	CACYBP
325	8.9856e-127	1.73313	0.372	0.134	2.65021e-122	CD8_IFNG	TNFSF9
326	4.30548e-124	1.57667	0.253	0.068	1.26986e-119	CD8_IFNG	SERPINH1
327	8.23893e-118	1.30473	0.875	0.815	2.42999e-113	CD8_IFNG	HSP90AB1
328	1.0228e-115	1.28429	0.342	0.123	3.01665e-111	CD8_IFNG	RHOB
329	1.71112e-107	1.44657	0.413	0.186	5.04679e-103	CD8_IFNG	NEU1
330	1.96113e-107	1.41853	0.409	0.18	5.78416e-103	CD8_IFNG	FKBP4
331	1.00296e-104	1.16076	0.883	0.788	2.95813e-100	CD8_IFNG	DUSP1
332	6.43855e-86	1.05539	0.271	0.095	1.89899e-81	CD8_IFNG	CCL3L1
333	2.37759e-80	0.997321	0.573	0.358	7.01246e-76	CD8_IFNG	TSPYL2
334	5.27995e-80	0.850742	0.816	0.677	1.55727e-75	CD8_IFNG	TXNIP
335	6.93732e-80	0.990545	0.957	0.956	2.04609e-75	CD8_IFNG	UBC
336	2.13315e-60	0.865347	0.218	0.084	6.29152e-56	CD8_IFNG	IER5L
337	1.5332e-58	0.976095	0.25	0.108	4.52203e-54	CD8_IFNG	TNFSF14
338	6.04817e-57	0.895999	0.398	0.231	1.78385e-52	CD8_IFNG	CHORDC1
339	2.10189e-55	0.962999	0.31	0.151	6.19932e-51	CD8_IFNG	ATF3
340	6.62441e-51	0.849285	0.872	0.862	1.9538e-46	CD8_IFNG	UBB
341	9.23466e-49	0.966774	0.157	0.055	2.72367e-44	CD8_IFNG	LIPF
342	3.53692e-46	0.875771	0.508	0.365	1.04318e-41	CD8_IFNG	DOK2
343	1.67294e-43	0.873355	0.189	0.079	4.93417e-39	CD8_IFNG	EGR1
344	3.42602e-40	0.998887	0.432	0.273	1.01047e-35	CD8_IFNG	KLF2
345	1.56571e-33	1.24555	0.253	0.138	4.61792e-29	CD8_IFNG	TNF
346	2.71462e-33	0.9552	0.26	0.14	8.00649e-29	CD8_IFNG	LINC02446
347	7.52326e-33	0.965688	0.363	0.242	2.21891e-28	CD8_IFNG	GADD45B
348	1.35618e-22	1.14287	0.216	0.131	3.99992e-18	CD8_IFNG	PGC
349	1.23891e-06	0.889659	0.16	0.117	0.0365404	CD8_IFNG	IGKV3-11
350	0.00445367	0.999229	0.092	0.121	1	CD8_IFNG	IGLV3-1
351	0	1.70501	0.416	0.108	0	CD8_GZMB	XCL1
352	0	1.68652	0.879	0.452	0	CD8_GZMB	CCL4
353	0	1.54376	0.479	0.11	0	CD8_GZMB	KLRC1
354	0	1.53327	0.523	0.15	0	CD8_GZMB	XCL2
355	0	1.45934	0.82	0.305	0	CD8_GZMB	CD8A
356	0	1.40554	0.756	0.253	0	CD8_GZMB	CD8B
357	0	0.957382	0.439	0.166	0	CD8_GZMB	ITGA1
358	0	0.888283	0.952	0.865	0	CD8_GZMB	ZFP36L2
359	0	0.862968	0.99	0.598	0	CD8_GZMB	CCL5
360	8.20817e-296	0.726039	0.592	0.277	2.42092e-291	CD8_GZMB	HOPX
361	4.84075e-273	1.12499	0.131	0.013	1.42773e-268	CD8_GZMB	TRBV4-2
362	1.7574e-254	0.488328	0.996	0.981	5.18328e-250	CD8_GZMB	MT-CO3
363	9.54602e-236	0.827534	0.24	0.067	2.8155e-231	CD8_GZMB	ZNF683
364	5.35243e-212	0.513154	0.936	0.825	1.57864e-207	CD8_GZMB	S100A6
365	6.42185e-211	0.729408	0.548	0.305	1.89406e-206	CD8_GZMB	CAPG
366	5.10018e-208	0.832242	0.361	0.157	1.50425e-203	CD8_GZMB	AUTS2
367	1.22025e-195	0.825882	0.546	0.335	3.59901e-191	CD8_GZMB	CD55
368	2.24014e-191	0.781947	0.601	0.39	6.60706e-187	CD8_GZMB	PTGER4
369	3.26863e-191	0.815919	0.324	0.136	9.6405e-187	CD8_GZMB	SPRY1
370	1.8979e-177	2.06008	0.27	0.109	5.59768e-173	CD8_GZMB	MTCO1P12
371	1.26944e-164	0.702291	0.862	0.751	3.74407e-160	CD8_GZMB	CD52
372	1.39474e-164	0.536865	0.902	0.772	4.11366e-160	CD8_GZMB	CXCR4
373	1.41781e-149	0.611424	0.742	0.549	4.18168e-145	CD8_GZMB	IL7R
374	3.16907e-146	0.59015	0.692	0.524	9.34685e-142	CD8_GZMB	CKLF
375	1.44552e-138	0.837541	0.406	0.233	4.26342e-134	CD8_GZMB	TOB1
376	7.75216e-135	0.523189	0.754	0.596	2.28642e-130	CD8_GZMB	CD3G
377	2.13457e-119	0.648799	0.593	0.417	6.29571e-115	CD8_GZMB	ID2
378	1.76759e-118	0.612629	0.544	0.381	5.21333e-114	CD8_GZMB	PARP8
379	1.12284e-109	0.496965	0.62	0.445	3.3117e-105	CD8_GZMB	CD63
380	7.82803e-107	0.531102	0.23	0.104	2.3088e-102	CD8_GZMB	SMIM3
381	1.66308e-106	0.85491	0.227	0.102	4.90509e-102	CD8_GZMB	AC092580.4
382	7.31812e-105	0.584672	0.215	0.095	2.15841e-100	CD8_GZMB	MYBL1
383	8.65561e-100	0.50244	0.84	0.723	2.55289e-95	CD8_GZMB	CD69
384	3.83534e-96	0.512494	0.443	0.289	1.13119e-91	CD8_GZMB	FKBP11
385	6.59997e-96	1.54974	0.423	0.277	1.94659e-91	CD8_GZMB	CCL4L2
386	3.49843e-94	0.507209	0.486	0.335	1.03183e-89	CD8_GZMB	ITGAE
387	2.07386e-91	0.582091	0.873	0.83	6.11664e-87	CD8_GZMB	ZFP36
388	2.40047e-91	0.532664	0.458	0.312	7.07996e-87	CD8_GZMB	RUNX3
389	2.76397e-91	0.492554	0.344	0.203	8.15206e-87	CD8_GZMB	THEMIS
390	1.1042e-90	0.541959	0.378	0.237	3.25674e-86	CD8_GZMB	SCML4
391	1.24937e-82	0.508393	0.256	0.135	3.6849e-78	CD8_GZMB	PTGER2
392	2.29392e-82	0.515005	0.211	0.102	6.7657e-78	CD8_GZMB	TFF2
393	1.89838e-79	0.523119	0.293	0.172	5.59907e-75	CD8_GZMB	ANKRD28
394	1.09305e-68	0.702162	0.488	0.373	3.22386e-64	CD8_GZMB	FOSB
395	1.39525e-53	0.657886	0.667	0.585	4.11514e-49	CD8_GZMB	FOS
396	3.84352e-53	0.598359	0.305	0.206	1.13361e-48	CD8_GZMB	AC020916.1
397	1.22031e-49	0.510773	0.34	0.243	3.59918e-45	CD8_GZMB	PFKFB3
398	5.30175e-37	0.515186	0.16	0.092	1.5637e-32	CD8_GZMB	CCL3L1
399	7.93049e-16	0.51295	0.289	0.246	2.33902e-11	CD8_GZMB	ATP5E
400	1.14832e-11	0.5525	0.118	0.085	3.38685e-07	CD8_GZMB	IGKV3-15
401	0	1.48087	0.834	0.404	0	CD4_IL7R	KLRB1
402	0	1.45504	0.894	0.543	0	CD4_IL7R	IL7R
403	0	1.24356	0.446	0.098	0	CD4_IL7R	CD40LG
404	0	1.09157	0.746	0.401	0	CD4_IL7R	RORA
405	0	0.978326	0.36	0.09	0	CD4_IL7R	CCR6
406	0	0.825856	0.979	0.798	0	CD4_IL7R	S100A4
407	0	0.560818	1	1	0	CD4_IL7R	RPLP1
408	1.58129e-307	0.675878	0.179	0.022	4.66387e-303	CD4_IL7R	IL4I1
409	1.40036e-248	1.10995	0.295	0.077	4.13024e-244	CD4_IL7R	CCL20
410	4.32498e-234	0.514818	0.998	0.989	1.27561e-229	CD4_IL7R	TPT1
411	4.40005e-198	0.634662	0.2	0.044	1.29775e-193	CD4_IL7R	TNFSF13B
412	2.01361e-187	0.523444	0.172	0.035	5.93895e-183	CD4_IL7R	DPP4
413	3.56236e-182	0.847995	0.701	0.405	1.05068e-177	CD4_IL7R	LTB
414	1.4945e-176	0.72205	0.389	0.161	4.40788e-172	CD4_IL7R	AQP3
415	1.93288e-165	0.568739	0.951	0.832	5.70083e-161	CD4_IL7R	S100A6
416	3.79571e-150	0.773999	0.404	0.187	1.11951e-145	CD4_IL7R	IFNGR1
417	3.6275e-144	0.783334	0.611	0.362	1.06989e-139	CD4_IL7R	GPR183
418	3.73712e-137	0.817806	0.852	0.733	1.10223e-132	CD4_IL7R	TNFAIP3
419	3.66256e-135	0.616849	0.527	0.289	1.08024e-130	CD4_IL7R	FKBP11
420	1.07212e-128	0.596025	0.31	0.129	3.16212e-124	CD4_IL7R	TNFRSF25
421	2.09006e-128	0.530408	0.237	0.083	6.16441e-124	CD4_IL7R	RUNX2
422	8.97201e-125	0.552735	0.245	0.09	2.6462e-120	CD4_IL7R	IFI44
423	6.83327e-121	0.610203	0.281	0.115	2.01541e-116	CD4_IL7R	PRR5
424	2.44051e-117	0.684784	0.457	0.248	7.19805e-113	CD4_IL7R	ERN1
425	1.59034e-116	0.646982	0.332	0.149	4.69056e-112	CD4_IL7R	TMIGD2
426	1.11305e-111	0.593807	0.903	0.782	3.28282e-107	CD4_IL7R	CXCR4
427	2.38413e-110	0.53185	0.3	0.131	7.03175e-106	CD4_IL7R	PERP
428	9.68782e-108	0.602349	0.516	0.31	2.85732e-103	CD4_IL7R	MGAT4A
429	1.99292e-102	0.50159	0.799	0.579	5.87791e-98	CD4_IL7R	ANXA1
430	1.98828e-101	0.535634	0.233	0.093	5.86422e-97	CD4_IL7R	ADAM19
431	3.00604e-100	0.555841	0.35	0.174	8.86602e-96	CD4_IL7R	ANKRD28
432	8.52086e-97	0.542825	0.893	0.756	2.51314e-92	CD4_IL7R	CD52
433	5.06874e-84	0.50006	0.235	0.102	1.49497e-79	CD4_IL7R	MYBL1
434	3.16694e-83	0.502839	0.624	0.447	9.34056e-79	CD4_IL7R	YWHAQ
435	5.59129e-79	0.566649	0.94	0.853	1.6491e-74	CD4_IL7R	VIM
436	6.55745e-79	0.527313	0.429	0.255	1.93405e-74	CD4_IL7R	ODF2L
437	1.88236e-78	0.571639	0.174	0.067	5.55184e-74	CD4_IL7R	AMICA1
438	6.22006e-77	0.560415	0.286	0.144	1.83455e-72	CD4_IL7R	SESN1
439	3.69179e-70	0.622249	0.851	0.732	1.08886e-65	CD4_IL7R	CD69
440	1.18178e-69	0.543141	0.487	0.316	3.48556e-65	CD4_IL7R	CXCR6
441	2.0413e-68	0.659826	0.721	0.584	6.02061e-64	CD4_IL7R	FOS
442	6.60212e-67	0.640307	0.233	0.111	1.94723e-62	CD4_IL7R	AC092580.4
443	2.71353e-66	0.72213	0.364	0.217	8.0033e-62	CD4_IL7R	CEBPD
444	4.18624e-62	0.667712	0.793	0.685	1.23469e-57	CD4_IL7R	NFKBIA
445	4.71509e-57	0.69502	0.725	0.605	1.39067e-52	CD4_IL7R	RGS1
446	1.93055e-54	0.490661	0.585	0.433	5.69397e-50	CD4_IL7R	ID2
447	3.25942e-37	0.511695	0.145	0.072	9.61334e-33	CD4_IL7R	RP11-138A9.2
448	7.32426e-33	0.521651	0.539	0.442	2.16022e-28	CD4_IL7R	AHNAK
449	1.82221e-23	0.794788	0.102	0.053	5.37441e-19	CD4_IL7R	TRBV20-1
450	9.53443e-13	0.505639	0.263	0.208	2.81209e-08	CD4_IL7R	LMNA
451	0	1.8362	0.543	0.069	0	CD4_CCR7	CCR7
452	0	1.52523	0.911	0.76	0	CD4_CCR7	RPL7
453	0	1.38665	0.4	0.08	0	CD4_CCR7	SELL
454	0	1.37942	0.963	0.921	0	CD4_CCR7	RPL21
455	0	1.34104	0.78	0.367	0	CD4_CCR7	LTB
456	0	1.32699	0.894	0.77	0	CD4_CCR7	RPL13A
457	0	1.2075	0.368	0.044	0	CD4_CCR7	LEF1
458	0	1.19393	0.466	0.118	0	CD4_CCR7	TCF7
459	0	1.15107	0.999	0.994	0	CD4_CCR7	RPL34
460	0	1.09594	0.995	0.977	0	CD4_CCR7	RPS6
461	0	1.08465	0.919	0.827	0	CD4_CCR7	RPL31
462	0	1.06601	0.287	0.034	0	CD4_CCR7	TSHZ2
463	0	1.00704	0.849	0.615	0	CD4_CCR7	LDHB
464	0	1.00677	0.707	0.45	0	CD4_CCR7	EIF3E
465	0	1.00067	0.993	0.97	0	CD4_CCR7	RPL3
466	0	0.98523	0.975	0.926	0	CD4_CCR7	RPL9
467	0	0.958689	0.995	0.979	0	CD4_CCR7	RPS2
468	0	0.950061	0.998	0.983	0	CD4_CCR7	RPS3A
469	0	0.923726	0.999	0.992	0	CD4_CCR7	RPS18
470	0	0.915119	0.998	0.993	0	CD4_CCR7	RPS8
471	0	0.908648	0.991	0.985	0	CD4_CCR7	RPL41
472	0	0.869147	1	0.997	0	CD4_CCR7	RPL32
473	0	0.836926	0.928	0.798	0	CD4_CCR7	PABPC1
474	0	0.827229	0.975	0.922	0	CD4_CCR7	RPL22
475	0	0.815798	0.998	0.997	0	CD4_CCR7	RPS27
476	0	0.806253	0.975	0.935	0	CD4_CCR7	RPL10A
477	0	0.791976	0.939	0.853	0	CD4_CCR7	RPL4
478	0	0.784679	0.995	0.982	0	CD4_CCR7	RPL36
479	0	0.784063	0.999	0.997	0	CD4_CCR7	RPL39
480	0	0.780252	1	0.997	0	CD4_CCR7	EEF1A1
481	0	0.772415	0.992	0.98	0	CD4_CCR7	RPLP2
482	0	0.7714	1	0.998	0	CD4_CCR7	RPL13
483	1.61219e-303	1.32167	0.516	0.23	4.755e-299	CD4_CCR7	KLF2
484	2.44805e-290	1.34184	0.473	0.208	7.22028e-286	CD4_CCR7	GNB2L1
485	1.47709e-262	1.05336	0.918	0.845	4.35652e-258	CD4_CCR7	RPS29
486	4.69148e-260	0.933166	0.85	0.709	1.3837e-255	CD4_CCR7	RPL36A
487	1.2366e-256	1.04752	0.436	0.18	3.64723e-252	CD4_CCR7	TMEM66
488	8.83177e-249	1.02255	0.763	0.594	2.60484e-244	CD4_CCR7	RPL23
489	3.1643e-245	1.00111	0.385	0.15	9.33278e-241	CD4_CCR7	GLTSCR2
490	7.36415e-237	0.876342	0.614	0.343	2.17198e-232	CD4_CCR7	GPR183
491	1.21764e-236	0.80046	0.884	0.779	3.5913e-232	CD4_CCR7	RPS10
492	1.0591e-235	0.845548	0.847	0.719	3.1237e-231	CD4_CCR7	RPL38
493	1.15312e-232	0.806322	0.884	0.78	3.40101e-228	CD4_CCR7	RPS11
494	4.49269e-223	1.15971	0.788	0.649	1.32508e-218	CD4_CCR7	RPL27A
495	1.16788e-222	0.793347	0.48	0.24	3.44456e-218	CD4_CCR7	TMEM123
496	4.81119e-204	0.906309	0.337	0.132	1.41901e-199	CD4_CCR7	FYB
497	2.828e-193	0.776134	0.381	0.163	8.3409e-189	CD4_CCR7	ATP5G2
498	1.22091e-190	1.1281	0.693	0.534	3.60095e-186	CD4_CCR7	RPS20
499	1.60552e-179	0.877783	0.896	0.817	4.73532e-175	CD4_CCR7	JUNB
500	7.13697e-168	0.782021	0.426	0.23	2.10498e-163	CD4_CCR7	NOSIP
501	0	2.9801	0.65	0.096	0	Treg	TNFRSF4
502	0	2.44046	0.872	0.285	0	Treg	BATF
503	0	2.04499	0.701	0.168	0	Treg	TNFRSF18
504	0	2.04385	0.512	0.02	0	Treg	FOXP3
505	0	1.98647	0.904	0.606	0	Treg	SAT1
506	0	1.93633	0.806	0.259	0	Treg	CTLA4
507	0	1.61094	0.779	0.399	0	Treg	CACYBP
508	0	1.58784	0.478	0.068	0	Treg	GK
509	0	1.54927	0.358	0.049	0	Treg	IL2RA
510	0	1.54319	0.74	0.293	0	Treg	DUSP4
511	0	1.5352	0.747	0.358	0	Treg	CARD16
512	0	1.49939	0.61	0.221	0	Treg	GPX1P1
513	0	1.46569	0.652	0.222	0	Treg	DNPH1
514	0	1.36319	0.446	0.074	0	Treg	TBC1D4
515	0	1.31552	0.863	0.504	0	Treg	SPOCK2
516	0	1.29714	0.485	0.162	0	Treg	MIR4435-2HG
517	0	1.29634	0.244	0.033	0	Treg	SOX4
518	0	1.2678	0.289	0.031	0	Treg	LAIR2
519	0	1.22792	0.265	0.008	0	Treg	IL1R2
520	0	1.06282	0.225	0.003	0	Treg	CCR8
521	0	1.0618	0.328	0.064	0	Treg	GNA15
522	0	1.06015	0.103	0.001	0	Treg	CD177
523	3.90558e-288	1.12964	0.615	0.263	1.15191e-283	Treg	ICOS
524	3.06939e-278	1.0617	0.457	0.155	9.05286e-274	Treg	ZNRF1
525	2.62019e-276	1.05634	0.352	0.091	7.72798e-272	Treg	TNFRSF9
526	2.75297e-275	1.17303	0.634	0.284	8.11962e-271	Treg	TIGIT
527	9.53003e-265	1.09214	0.665	0.33	2.81079e-260	Treg	PBXIP1
528	5.56896e-260	1.13127	0.491	0.182	1.64251e-255	Treg	PELI1
529	3.50223e-255	1.7755	0.697	0.372	1.03295e-250	Treg	HSPA1A
530	1.16395e-239	1.11856	0.626	0.29	3.43294e-235	Treg	PHLDA1
531	4.98747e-239	1.20571	0.293	0.075	1.471e-234	Treg	MAGEH1
532	3.71231e-222	1.05876	0.579	0.277	1.09491e-217	Treg	CORO1B
533	7.0974e-217	1.08245	0.609	0.309	2.09331e-212	Treg	BTG3
534	9.18296e-216	1.04206	0.758	0.494	2.70842e-211	Treg	UCP2
535	2.43725e-214	1.03016	0.842	0.651	7.18843e-210	Treg	SOD1
536	9.7276e-182	1.22354	0.283	0.084	2.86906e-177	Treg	CCL20
537	9.84347e-178	1.37056	0.588	0.319	2.90323e-173	Treg	HSPH1
538	1.03056e-160	1.55747	0.542	0.286	3.03952e-156	Treg	HSPA1B
539	6.2307e-159	1.37693	0.67	0.436	1.83768e-154	Treg	HSPD1
540	1.55859e-153	1.23179	0.637	0.4	4.5969e-149	Treg	HSPB1
541	3.50955e-147	1.36838	0.943	0.876	1.03511e-142	Treg	HSP90AA1
542	2.29455e-143	1.12029	0.22	0.063	6.76754e-139	Treg	SERPINH1
543	5.0997e-143	1.41334	0.747	0.559	1.50411e-138	Treg	HSPE1
544	9.35063e-134	1.0356	0.381	0.171	2.75787e-129	Treg	FKBP4
545	9.69148e-132	1.11927	0.891	0.81	2.85841e-127	Treg	HSP90AB1
546	3.77291e-119	1.26923	0.428	0.224	1.11278e-114	Treg	PLIN2
547	9.76323e-110	1.33392	0.322	0.145	2.87957e-105	Treg	BAG3
548	7.1127e-76	1.33105	0.748	0.645	2.09782e-71	Treg	DNAJB1
549	3.78463e-18	1.11254	0.1	0.055	1.11624e-13	Treg	TRBV20-1
550	1.44661e-09	1.28687	0.121	0.084	4.26663e-05	Treg	CXCL13
