# Supplementary material for: Single-cell dissection of prognostic architecture and immunotherap response in Helicobacter pylori infection-associated gastric cancer
Source: eLife. 2025 Jun 17;13:RP99337. doi: 10.7554/eLife.99337 (PMC12173458; doi:10.7554/eLife.99337)
Supplement: Supplementary file 5. [file elife-99337-supp5.xlsx]

## Sheet: Table S5
Supplementary Table S5 DEGs of myeloid cells subclusters
	p_val	avg_log2FC	pct.1	pct.2	p_val_adj	cluster	gene
1	0	7.61768	0.999	0.014	0	CPA3_Mast	TPSAB1
2	0	6.34641	0.762	0.006	0	CPA3_Mast	TPSB2
3	0	5.97895	0.965	0.004	0	CPA3_Mast	CPA3
4	0	5.07422	0.645	0.001	0	CPA3_Mast	TPSD1
5	0	4.26254	0.9	0.003	0	CPA3_Mast	GATA2
6	0	4.09402	0.855	0.007	0	CPA3_Mast	KIT
7	0	3.93372	0.837	0.131	0	CPA3_Mast	CD69
8	0	3.87776	0.874	0.024	0	CPA3_Mast	CLU
9	0	3.21998	0.847	0.022	0	CPA3_Mast	HPGDS
10	0	3.20658	0.829	0.029	0	CPA3_Mast	VWA5A
11	0	3.14666	0.866	0.1	0	CPA3_Mast	LTC4S
12	0	2.93925	0.719	0.003	0	CPA3_Mast	HDC
13	0	2.897	0.707	0.169	0	CPA3_Mast	SOCS1
14	0	2.85899	0.752	0.002	0	CPA3_Mast	SLC18A2
15	0	2.81188	0.672	0.001	0	CPA3_Mast	MS4A2
16	0	2.63051	0.497	0.036	0	CPA3_Mast	CSF1
17	0	2.59889	0.712	0.002	0	CPA3_Mast	IL1RL1
18	0	2.4462	0.556	0.007	0	CPA3_Mast	SLC24A3
19	0	2.44355	0.581	0.046	0	CPA3_Mast	HPGD
20	0	2.44328	0.567	0.001	0	CPA3_Mast	RHEX
21	0	2.28633	0.878	0.291	0	CPA3_Mast	CD9
22	0	2.2259	0.858	0.456	0	CPA3_Mast	LMNA
23	0	2.22152	0.631	0.017	0	CPA3_Mast	BACE2
24	0	2.15031	0.608	0.002	0	CPA3_Mast	MAOB
25	0	2.08952	0.873	0.445	0	CPA3_Mast	LAPTM4A
26	0	2.07814	0.517	0.004	0	CPA3_Mast	SIGLEC17P
27	0	2.03881	0.595	0.166	0	CPA3_Mast	TSC22D1
28	0	2.03372	0.82	0.428	0	CPA3_Mast	NFKBIZ
29	0	2.02913	0.582	0.174	0	CPA3_Mast	NSMCE1
30	9.70937e-271	2.52895	0.715	0.398	3.19351e-266	CPA3_Mast	TUBA1A
31	0	3.23901	0.441	0.006	0	CXCR2_Neu	CMTM2
32	0	2.98153	0.429	0.015	0	CXCR2_Neu	FCGR3B
33	0	2.84969	0.272	0.002	0	CXCR2_Neu	AL049651.1
34	2.02525e-229	2.76611	0.658	0.091	6.66125e-225	CXCR2_Neu	FP236383.1
35	1.24632e-211	3.71933	0.748	0.178	4.09928e-207	CXCR2_Neu	CSF3R
36	3.23906e-209	3.49781	0.939	0.32	1.06536e-204	CXCR2_Neu	G0S2
37	5.46747e-191	4.6634	0.968	0.658	1.79831e-186	CXCR2_Neu	IFITM2
38	1.95892e-185	3.53271	0.875	0.299	6.44307e-181	CXCR2_Neu	CXCL8
39	3.6345e-177	3.39703	0.959	0.571	1.19542e-172	CXCR2_Neu	NAMPT
40	4.53545e-146	3.54489	0.614	0.158	1.49176e-141	CXCR2_Neu	CPD
41	1.45939e-137	3.17515	0.661	0.195	4.80008e-133	CXCR2_Neu	IFITM1
42	3.30704e-136	3.41709	0.562	0.131	1.08772e-131	CXCR2_Neu	IL1R2
43	3.71818e-131	2.8706	0.464	0.088	1.22295e-126	CXCR2_Neu	RIPOR2
44	1.5042e-126	3.07744	0.693	0.253	4.94748e-122	CXCR2_Neu	TREM1
45	2.70753e-123	2.88394	0.548	0.138	8.90535e-119	CXCR2_Neu	AQP9
46	1.90227e-115	2.9523	0.435	0.086	6.25677e-111	CXCR2_Neu	LUCAT1
47	1.07293e-108	2.98028	0.754	0.412	3.52896e-104	CXCR2_Neu	RNF149
48	2.68264e-108	3.22237	0.559	0.17	8.82348e-104	CXCR2_Neu	ARHGAP26
49	2.70369e-105	2.60787	0.838	0.621	8.8927e-101	CXCR2_Neu	LITAF
50	3.84231e-105	2.76189	0.788	0.332	1.26377e-100	CXCR2_Neu	S100A8
51	7.74924e-94	2.67843	0.664	0.297	2.5488e-89	CXCR2_Neu	FPR1
52	3.65017e-83	2.95377	0.58	0.24	1.20058e-78	CXCR2_Neu	SMCHD1
53	1.36166e-82	2.77014	0.62	0.283	4.47863e-78	CXCR2_Neu	MXD1
54	2.10182e-76	3.26651	0.62	0.308	6.9131e-72	CXCR2_Neu	ACSL1
55	2.32523e-75	3.1198	0.42	0.121	7.64792e-71	CXCR2_Neu	DOCK4
56	2.18401e-70	2.61557	0.368	0.096	7.18344e-66	CXCR2_Neu	IL1RAP
57	7.43048e-49	2.59858	0.481	0.23	2.44396e-44	CXCR2_Neu	PELI1
58	6.77226e-47	2.55276	0.409	0.167	2.22746e-42	CXCR2_Neu	NEDD9
59	2.59475e-42	3.00174	0.359	0.138	8.53439e-38	CXCR2_Neu	CAMK1D
60	2.15783e-41	2.54992	0.504	0.289	7.09732e-37	CXCR2_Neu	PDE4B
61	0	2.66948	0.744	0.074	0	VCAN_Mono	FCN1
62	0	2.66576	0.947	0.381	0	VCAN_Mono	S100A9
63	0	2.43226	0.891	0.262	0	VCAN_Mono	S100A8
64	0	2.16186	0.539	0.066	0	VCAN_Mono	S100A12
65	0	1.9184	0.672	0.126	0	VCAN_Mono	VCAN
66	3.82654e-298	1.71042	0.368	0.033	1.25859e-293	VCAN_Mono	APOBEC3A
67	7.90288e-292	2.14919	0.718	0.217	2.59934e-287	VCAN_Mono	THBS1
68	1.39229e-270	1.4941	0.685	0.218	4.5794e-266	VCAN_Mono	CSTA
69	1.8713e-267	1.96941	0.624	0.162	6.15489e-263	VCAN_Mono	EREG
70	3.87791e-267	1.27177	0.737	0.243	1.27548e-262	VCAN_Mono	FPR1
71	2.11313e-242	1.30113	0.85	0.366	6.95029e-238	VCAN_Mono	SERPINA1
72	5.00978e-234	1.15592	0.992	0.788	1.64777e-229	VCAN_Mono	S100A4
73	3.14541e-224	1.19935	0.749	0.258	1.03456e-219	VCAN_Mono	SLC11A1
74	3.13385e-221	1.59024	0.954	0.535	1.03075e-216	VCAN_Mono	LYZ
75	2.00698e-203	1.63223	0.938	0.723	6.60116e-199	VCAN_Mono	TIMP1
76	1.31067e-201	1.27895	0.453	0.097	4.31094e-197	VCAN_Mono	CD300E
77	1.77086e-192	1.13442	0.921	0.614	5.82454e-188	VCAN_Mono	COTL1
78	2.93552e-188	1.14781	0.672	0.239	9.65522e-184	VCAN_Mono	SLC25A37
79	3.68088e-188	1.37578	0.737	0.333	1.21068e-183	VCAN_Mono	UPP1
80	7.35157e-171	1.38069	0.619	0.233	2.41801e-166	VCAN_Mono	NLRP3
81	3.74427e-157	1.15409	0.896	0.551	1.23153e-152	VCAN_Mono	CTSS
82	7.11979e-157	1.16289	0.838	0.464	2.34177e-152	VCAN_Mono	LST1
83	1.38604e-149	1.30242	0.63	0.245	4.55883e-145	VCAN_Mono	IL1B
84	3.65713e-149	1.17651	0.332	0.068	1.20287e-144	VCAN_Mono	MCEMP1
85	1.03942e-143	1.24083	0.549	0.204	3.41874e-139	VCAN_Mono	HBEGF
86	1.42141e-132	1.3629	0.564	0.242	4.67517e-128	VCAN_Mono	PPIF
87	6.03514e-132	1.22672	0.716	0.427	1.98502e-127	VCAN_Mono	STXBP2
88	2.09782e-125	1.2615	0.4	0.122	6.89995e-121	VCAN_Mono	OLR1
89	5.50256e-116	1.21406	0.284	0.064	1.80985e-111	VCAN_Mono	RETN
90	9.3747e-40	1.49398	0.173	0.059	3.08343e-35	VCAN_Mono	IL8
91	0	4.75623	0.526	0.033	0	Angio-TAM	CXCL5
92	0	3.35693	0.587	0.088	0	Angio-TAM	CCL20
93	0	2.99278	0.952	0.304	0	Angio-TAM	C15orf48
94	0	2.63857	0.759	0.18	0	Angio-TAM	IL1RN
95	0	2.58846	0.977	0.572	0	Angio-TAM	SOD2
96	0	2.09167	1	0.998	0	Angio-TAM	FTH1
97	7.1185e-292	3.44325	0.719	0.191	2.34135e-287	Angio-TAM	CXCL3
98	1.23599e-261	2.82568	0.77	0.243	4.06528e-257	Angio-TAM	IL1B
99	5.14323e-259	3.29039	0.487	0.078	1.69166e-254	Angio-TAM	SPP1
100	1.27234e-245	2.45723	0.794	0.269	4.18486e-241	Angio-TAM	CXCL8
101	3.77321e-240	2.10791	0.937	0.727	1.24105e-235	Angio-TAM	MIF
102	6.11449e-229	1.74981	0.99	0.912	2.01112e-224	Angio-TAM	GAPDH
103	1.06221e-224	2.59755	0.76	0.269	3.49373e-220	Angio-TAM	CXCL2
104	1.30233e-221	2.60539	0.951	0.731	4.28348e-217	Angio-TAM	TIMP1
105	1.65022e-215	1.72411	0.291	0.026	5.42775e-211	Angio-TAM	IL1A
106	3.19484e-213	2.07431	0.369	0.049	1.05082e-208	Angio-TAM	TNFAIP6
107	5.20464e-199	1.9681	0.923	0.659	1.71186e-194	Angio-TAM	CSTB
108	4.81518e-191	2.62495	0.736	0.274	1.58376e-186	Angio-TAM	CCL3
109	2.56304e-190	3.47572	0.2	0.01	8.43009e-186	Angio-TAM	PPBP
110	6.43032e-177	1.79597	0.619	0.234	2.115e-172	Angio-TAM	C1orf122
111	1.41874e-145	3.37235	0.832	0.587	4.66638e-141	Angio-TAM	MT2A
112	3.91109e-141	2.71541	0.551	0.189	1.2864e-136	Angio-TAM	CCL3L1
113	2.87249e-138	2.65405	0.397	0.094	9.44792e-134	Angio-TAM	CXCL1
114	1.48488e-128	2.1971	0.484	0.166	4.88391e-124	Angio-TAM	MT1F
115	2.05407e-116	2.34278	0.434	0.139	6.75603e-112	Angio-TAM	MT1E
116	1.80118e-100	2.92151	0.574	0.286	5.92426e-96	Angio-TAM	MT1X
117	6.66499e-96	1.89417	0.651	0.316	2.19218e-91	Angio-TAM	CCL4
118	1.72795e-90	2.79555	0.36	0.115	5.68339e-86	Angio-TAM	MT1G
119	2.51977e-68	2.55228	0.178	0.036	8.28777e-64	Angio-TAM	MT1H
120	6.69273e-46	1.74333	0.436	0.242	2.20131e-41	Angio-TAM	PTGS2
121	0	3.10131	0.879	0.263	0	TREM2_TAM	APOE
122	0	3.00548	0.836	0.226	0	TREM2_TAM	APOC1
123	0	2.15369	0.966	0.47	0	TREM2_TAM	CTSD
124	0	2.14644	0.861	0.295	0	TREM2_TAM	ACP5
125	0	2.11829	0.996	0.648	0	TREM2_TAM	CTSB
126	0	2.10983	0.919	0.237	0	TREM2_TAM	C1QB
127	0	1.98891	0.913	0.235	0	TREM2_TAM	C1QC
128	0	1.93974	0.928	0.259	0	TREM2_TAM	C1QA
129	0	1.9034	0.964	0.479	0	TREM2_TAM	CTSZ
130	0	1.87017	0.693	0.089	0	TREM2_TAM	GPNMB
131	0	1.83621	0.783	0.252	0	TREM2_TAM	FABP5
132	0	1.83372	0.848	0.269	0	TREM2_TAM	CTSL
133	0	1.74196	1	0.993	0	TREM2_TAM	FTL
134	0	1.67427	0.842	0.299	0	TREM2_TAM	PLD3
135	0	1.61293	0.886	0.433	0	TREM2_TAM	CD68
136	0	1.5461	0.556	0.054	0	TREM2_TAM	TREM2
137	0	1.53964	0.763	0.195	0	TREM2_TAM	LGMN
138	0	1.5134	0.655	0.127	0	TREM2_TAM	PLA2G7
139	0	1.47018	0.877	0.393	0	TREM2_TAM	CTSC
140	0	1.4631	0.932	0.511	0	TREM2_TAM	GRN
141	0	1.43263	0.99	0.808	0	TREM2_TAM	PSAP
142	2.56273e-297	1.35304	0.646	0.174	8.42909e-293	TREM2_TAM	LIPA
143	2.52128e-293	2.58944	0.417	0.056	8.29275e-289	TREM2_TAM	CCL18
144	5.49686e-272	1.33108	0.93	0.483	1.80797e-267	TREM2_TAM	ANXA2
145	6.52533e-272	1.45603	0.951	0.625	2.14625e-267	TREM2_TAM	LGALS3
146	1.28088e-230	2.43203	0.338	0.046	4.21295e-226	TREM2_TAM	MMP12
147	8.77129e-230	1.48347	0.846	0.433	2.88496e-225	TREM2_TAM	HLA-DRB5
148	1.22388e-200	1.5617	0.415	0.089	4.02545e-196	TREM2_TAM	MMP9
149	9.61344e-128	1.95635	0.236	0.044	3.16196e-123	TREM2_TAM	FN1
150	3.62565e-50	1.44376	0.279	0.125	1.19251e-45	TREM2_TAM	IFI27
151	6.36785e-145	2.00535	0.922	0.335	2.09445e-140	C1QC_TAM	C1QC
152	2.47117e-123	2.09395	0.629	0.164	8.12794e-119	C1QC_TAM	SELENOP
153	9.33722e-116	1.65305	0.909	0.359	3.0711e-111	C1QC_TAM	C1QA
154	3.50114e-111	1.69647	0.875	0.341	1.15156e-106	C1QC_TAM	C1QB
155	2.63761e-98	1.37502	1	0.994	8.67537e-94	C1QC_TAM	FTL
156	1.89633e-51	1.25696	0.89	0.657	6.23721e-47	C1QC_TAM	HLA-DPA1
157	3.91204e-51	1.82776	0.303	0.084	1.28671e-46	C1QC_TAM	DNASE1L3
158	1.48427e-48	1.37345	0.747	0.64	4.8819e-44	C1QC_TAM	PRDX1
159	3.46669e-48	1.80491	0.46	0.197	1.14023e-43	C1QC_TAM	SLC40A1
160	2.42425e-43	1.53991	0.603	0.329	7.97359e-39	C1QC_TAM	APOC1
161	2.32148e-42	1.53375	0.765	0.675	7.63558e-38	C1QC_TAM	TUBA1B
162	8.59252e-37	1.28597	0.645	0.367	2.82617e-32	C1QC_TAM	APOE
163	1.57446e-36	1.92918	0.413	0.189	5.17855e-32	C1QC_TAM	IGKV1-5
164	2.82709e-31	1.30485	0.386	0.188	9.29857e-27	C1QC_TAM	GGTA1P
165	2.70186e-29	1.2006	0.629	0.478	8.88669e-25	C1QC_TAM	TMEM176B
166	2.68787e-28	1.30736	0.624	0.479	8.84068e-24	C1QC_TAM	CTSC
167	9.0249e-26	1.16103	0.65	0.513	2.96838e-21	C1QC_TAM	CD68
168	1.244e-24	2.36545	0.198	0.066	4.09164e-20	C1QC_TAM	IGHV4-34
169	2.46347e-24	1.21487	0.232	0.089	8.10262e-20	C1QC_TAM	ADAMDEC1
170	5.78853e-21	1.18733	0.535	0.408	1.9039e-16	C1QC_TAM	YWHAH
171	2.46578e-18	1.44587	0.337	0.189	8.11019e-14	C1QC_TAM	JCHAIN
172	6.40839e-18	2.29702	0.292	0.149	2.10778e-13	C1QC_TAM	IGLV2-14
173	2.60731e-15	1.64414	0.136	0.046	8.57569e-11	C1QC_TAM	MT1H
174	1.0857e-13	1.30544	0.366	0.26	3.57097e-09	C1QC_TAM	LIPA
175	5.24204e-11	2.04808	0.24	0.136	1.72416e-06	C1QC_TAM	MT1G
176	9.74683e-10	1.19578	0.436	0.35	3.20583e-05	C1QC_TAM	FABP5
177	1.36587e-08	1.16059	0.185	0.098	0.000449247	C1QC_TAM	MMP12
178	1.71339e-08	1.26387	0.191	0.109	0.000563552	C1QC_TAM	IGLV1-40
179	2.27773e-08	2.89303	0.172	0.094	0.000749167	C1QC_TAM	IGKV3-15
180	3.86209e-08	1.99312	0.164	0.089	0.00127028	C1QC_TAM	IGLV2-23
181	0	3.36549	0.625	0.088	0	FOLR2_TAM	F13A1
182	0	3.1176	0.807	0.139	0	FOLR2_TAM	SELENOP
183	0	2.46795	0.355	0.016	0	FOLR2_TAM	LYVE1
184	6.71593e-252	3.56139	0.758	0.19	2.20894e-247	FOLR2_TAM	RNASE1
185	1.12471e-247	2.4415	0.606	0.108	3.69929e-243	FOLR2_TAM	FOLR2
186	1.75308e-235	2.79546	0.797	0.255	5.76606e-231	FOLR2_TAM	STAB1
187	3.62817e-203	1.98004	0.917	0.346	1.19334e-198	FOLR2_TAM	C1QA
188	4.50465e-192	2.53691	0.634	0.159	1.48162e-187	FOLR2_TAM	PLTP
189	3.46991e-189	2.70316	0.644	0.175	1.14129e-184	FOLR2_TAM	PDK4
190	1.45483e-185	1.83424	0.893	0.327	4.78507e-181	FOLR2_TAM	C1QB
191	1.17786e-183	1.74566	0.895	0.324	3.87409e-179	FOLR2_TAM	C1QC
192	4.58559e-153	1.64103	0.865	0.423	1.50825e-148	FOLR2_TAM	MS4A6A
193	2.65934e-143	2.06729	0.6	0.189	8.74683e-139	FOLR2_TAM	MRC1
194	1.19571e-137	1.68472	0.602	0.179	3.93282e-133	FOLR2_TAM	SLC40A1
195	4.47039e-136	1.80923	0.687	0.27	1.47036e-131	FOLR2_TAM	DAB2
196	3.44631e-130	1.69128	0.85	0.512	1.13353e-125	FOLR2_TAM	FCGRT
197	3.46104e-130	1.65879	0.557	0.17	1.13837e-125	FOLR2_TAM	GGTA1P
198	1.35466e-129	1.9153	0.722	0.316	4.45562e-125	FOLR2_TAM	CD163
199	3.07674e-128	1.54754	0.39	0.08	1.01197e-123	FOLR2_TAM	LILRB5
200	3.26331e-128	1.71638	0.795	0.425	1.07333e-123	FOLR2_TAM	MS4A7
201	1.98691e-126	1.9081	0.642	0.246	6.53514e-122	FOLR2_TAM	MS4A4A
202	5.22967e-116	1.71723	0.675	0.275	1.72009e-111	FOLR2_TAM	LGMN
203	8.42738e-115	1.52761	0.548	0.182	2.77185e-110	FOLR2_TAM	SLCO2B1
204	1.62874e-113	1.5119	0.553	0.179	5.35708e-109	FOLR2_TAM	A2M
205	3.90786e-103	1.60926	0.698	0.331	1.28534e-98	FOLR2_TAM	MAFB
206	3.84589e-99	1.74109	0.713	0.361	1.26495e-94	FOLR2_TAM	FGL2
207	5.80678e-90	1.77067	0.689	0.36	1.90991e-85	FOLR2_TAM	RHOB
208	1.45394e-84	1.72059	0.644	0.319	4.78215e-80	FOLR2_TAM	CFD
209	1.14916e-71	1.59245	0.235	0.047	3.77969e-67	FOLR2_TAM	PGA3
210	1.67436e-56	1.50365	0.636	0.401	5.50713e-52	FOLR2_TAM	ATF3
211	0	1.92533	0.474	0.021	0	CD1C_DC	CD1C
212	0	1.42187	0.364	0.018	0	CD1C_DC	CD1E
213	2.35194e-286	2.0544	0.993	0.606	7.73577e-282	CD1C_DC	HLA-DPB1
214	5.38026e-282	1.73137	0.594	0.103	1.76962e-277	CD1C_DC	CLEC10A
215	9.08842e-259	1.83872	0.997	0.634	2.98927e-254	CD1C_DC	HLA-DPA1
216	2.36241e-252	1.99498	0.977	0.525	7.77019e-248	CD1C_DC	HLA-DQB1
217	1.60629e-247	1.79024	0.999	0.672	5.28324e-243	CD1C_DC	HLA-DRA
218	7.40698e-221	1.72302	0.994	0.695	2.43623e-216	CD1C_DC	HLA-DRB1
219	2.98811e-220	1.71935	0.97	0.483	9.82819e-216	CD1C_DC	HLA-DQA1
220	1.09703e-213	1.84758	0.473	0.084	3.60823e-209	CD1C_DC	NAPSB
221	1.91582e-200	1.60882	0.741	0.244	6.30133e-196	CD1C_DC	PPA1
222	1.96111e-192	1.43319	1	0.834	6.45028e-188	CD1C_DC	CD74
223	6.48422e-174	1.4146	0.868	0.378	2.13272e-169	CD1C_DC	LSP1
224	1.53699e-162	1.44742	0.751	0.282	5.05532e-158	CD1C_DC	CPVL
225	1.89479e-157	1.04145	0.787	0.285	6.23215e-153	CD1C_DC	HLA-DMB
226	1.87471e-154	1.11105	0.513	0.129	6.16612e-150	CD1C_DC	JAML
227	1.15951e-140	1.03631	0.916	0.466	3.81375e-136	CD1C_DC	HLA-DMA
228	3.06075e-140	1.10452	0.834	0.398	1.00671e-135	CD1C_DC	CORO1A
229	1.4823e-137	1.48954	0.847	0.449	4.87543e-133	CD1C_DC	GPR183
230	4.72681e-136	1.50109	0.98	0.859	1.55469e-131	CD1C_DC	CST3
231	2.73809e-135	1.1826	0.486	0.124	9.00584e-131	CD1C_DC	CST7
232	6.82514e-135	1.22165	0.616	0.202	2.24486e-130	CD1C_DC	LGALS2
233	1.10119e-134	1.56936	0.402	0.091	3.62193e-130	CD1C_DC	FCER1A
234	3.0984e-105	1.06125	0.22	0.033	1.01909e-100	CD1C_DC	AMICA1
235	1.10471e-103	1.0741	0.942	0.628	3.63351e-99	CD1C_DC	COTL1
236	1.20768e-97	1.12677	0.327	0.076	3.97219e-93	CD1C_DC	LTB
237	6.33888e-97	1.22583	0.436	0.138	2.08492e-92	CD1C_DC	HLA-DQA2
238	1.68475e-87	1.24887	0.619	0.273	5.54131e-83	CD1C_DC	INSIG1
239	1.52186e-76	1.14029	0.807	0.47	5.00556e-72	CD1C_DC	HERPUD1
240	4.13633e-60	1.70152	0.256	0.072	1.36048e-55	CD1C_DC	S100B
241	0	4.62291	0.778	0.016	0	LAMP3_DC	CCL22
242	0	4.36289	0.706	0.011	0	LAMP3_DC	CCL19
243	0	3.98993	0.937	0.035	0	LAMP3_DC	CCR7
244	0	2.76925	0.825	0.035	0	LAMP3_DC	LAMP3
245	0	2.27821	0.698	0.019	0	LAMP3_DC	LAD1
246	1.54065e-301	4.39332	0.929	0.067	5.06736e-297	LAMP3_DC	FSCN1
247	7.08328e-237	3.04303	0.754	0.051	2.32976e-232	LAMP3_DC	IDO1
248	2.67464e-233	2.25022	0.579	0.028	8.79714e-229	LAMP3_DC	RAMP1
249	3.33676e-207	2.89484	0.381	0.012	1.09749e-202	LAMP3_DC	CCL17
250	1.10112e-181	2.25171	0.54	0.032	3.6217e-177	LAMP3_DC	UBD
251	1.87983e-178	1.96111	0.802	0.083	6.18294e-174	LAMP3_DC	DAPP1
252	2.59572e-163	2.83409	0.516	0.034	8.53757e-159	LAMP3_DC	WFDC21P
253	3.83065e-105	2.78892	0.746	0.129	1.25994e-100	LAMP3_DC	EBI3
254	8.43904e-97	2.83595	0.746	0.139	2.77568e-92	LAMP3_DC	DUSP5
255	5.9046e-91	1.9496	0.833	0.198	1.94208e-86	LAMP3_DC	RAB9A
256	1.66117e-90	1.81653	0.722	0.133	5.46375e-86	LAMP3_DC	MGLL
257	9.05094e-86	2.96777	0.921	0.299	2.97694e-81	LAMP3_DC	BIRC3
258	8.26111e-85	1.89847	0.706	0.127	2.71716e-80	LAMP3_DC	IL32
259	2.14357e-81	2.39794	0.73	0.149	7.05042e-77	LAMP3_DC	CST7
260	2.35928e-77	2.95588	0.841	0.23	7.7599e-73	LAMP3_DC	MARCKSL1
261	2.27322e-76	1.82016	0.762	0.181	7.47686e-72	LAMP3_DC	GRSF1
262	7.68079e-73	1.98772	0.786	0.176	2.52629e-68	LAMP3_DC	IL7R
263	1.60557e-72	2.56294	0.952	0.416	5.28089e-68	LAMP3_DC	LSP1
264	5.85479e-66	2.23855	0.849	0.282	1.9257e-61	LAMP3_DC	PPA1
265	7.24546e-66	3.49624	0.984	0.701	2.3831e-61	LAMP3_DC	TXN
266	1.47968e-56	1.85195	0.778	0.257	4.8668e-52	LAMP3_DC	ANXA6
267	1.96716e-55	2.58155	0.976	0.541	6.4702e-51	LAMP3_DC	CRIP1
268	9.18354e-45	1.83768	0.857	0.475	3.02056e-40	LAMP3_DC	SYNGR2
269	2.13511e-41	1.82952	0.31	0.047	7.02259e-37	LAMP3_DC	PPP1R14A
270	1.0814e-38	1.84627	0.992	0.987	3.55683e-34	LAMP3_DC	ACTB
271	0	5.66247	0.982	0.021	0	GZMB_pDC	GZMB
272	0	3.63243	0.842	0.014	0	GZMB_pDC	CLIC3
273	0	2.8694	0.456	0.004	0	GZMB_pDC	TCL1A
274	0	2.83061	0.702	0.004	0	GZMB_pDC	LILRA4
275	0	2.77023	0.789	0.014	0	GZMB_pDC	CXCR3
276	0	2.27507	0.544	0.001	0	GZMB_pDC	SCT
277	0	2.24171	0.807	0.005	0	GZMB_pDC	SMPD3
278	3.43267e-256	2.88323	0.895	0.033	1.12904e-251	GZMB_pDC	TSPAN13
279	5.19245e-232	2.59381	0.772	0.026	1.70785e-227	GZMB_pDC	SPIB
280	7.17481e-213	2.34662	0.737	0.025	2.35987e-208	GZMB_pDC	MZB1
281	2.24239e-184	3.0681	0.842	0.042	7.37544e-180	GZMB_pDC	C12orf75
282	1.12116e-131	2.41322	0.912	0.071	3.6876e-127	GZMB_pDC	PTPRCAP
283	5.7894e-122	3.61871	0.316	0.008	1.90419e-117	GZMB_pDC	PTGDS
284	2.94498e-116	2.95831	0.789	0.061	9.68633e-112	GZMB_pDC	IRF4
285	1.56685e-108	3.15287	0.895	0.09	5.15352e-104	GZMB_pDC	PLD4
286	3.96175e-105	2.69095	0.93	0.101	1.30306e-100	GZMB_pDC	TCF4
287	3.89162e-90	3.38435	0.93	0.117	1.27999e-85	GZMB_pDC	PLAC8
288	2.07485e-73	2.25955	0.86	0.124	6.8244e-69	GZMB_pDC	CCDC50
289	6.29572e-71	3.12532	0.772	0.095	2.07072e-66	GZMB_pDC	LTB
290	6.60382e-69	2.32371	0.825	0.119	2.17206e-64	GZMB_pDC	IL3RA
291	7.41399e-60	3.46646	0.965	0.225	2.43853e-55	GZMB_pDC	IRF7
292	3.99773e-59	3.56505	0.579	0.065	1.31489e-54	GZMB_pDC	IGJ
293	6.45761e-57	2.26569	0.807	0.134	2.12397e-52	GZMB_pDC	SERPINF1
294	5.69248e-49	2.56344	0.912	0.224	1.87231e-44	GZMB_pDC	ITM2C
295	9.11723e-46	2.63722	0.825	0.18	2.99875e-41	GZMB_pDC	LDLRAD4
296	1.27601e-42	2.54771	0.877	0.237	4.19694e-38	GZMB_pDC	IRF8
297	3.43057e-40	2.44474	0.737	0.145	1.12835e-35	GZMB_pDC	DUSP5
298	3.20314e-37	2.35778	0.965	0.384	1.05354e-32	GZMB_pDC	CXCR4
299	1.26786e-35	2.34377	0.93	0.331	4.17011e-31	GZMB_pDC	PPP1R14B
300	1.24799e-32	2.85966	0.947	0.484	4.10477e-28	GZMB_pDC	GPR183
