# Supplementary material for: Single-cell dissection of prognostic architecture and immunotherap response in Helicobacter pylori infection-associated gastric cancer
Source: eLife. 2025 Jun 17;13:RP99337. doi: 10.7554/eLife.99337 (PMC12173458; doi:10.7554/eLife.99337)
Supplement: Supplementary file 6. [file elife-99337-supp6.xlsx]

## Sheet: Table S6
Supplementary Table S6 DEGs of cancer associated fibroblasts subclusters
	p_val	avg_log2FC	pct.1	pct.2	p_val_adj	cluster	gene
1	0	3.63521	0.557	0.01	0	iCAF	CXCL5
2	0	2.40824	0.416	0.007	0	iCAF	IL24
3	3.14242e-271	1.90424	0.489	0.023	1.03357e-266	iCAF	C15orf48
4	7.24223e-253	2.0949	0.235	0.002	2.38204e-248	iCAF	CSF3
5	3.77718e-240	3.10595	0.706	0.069	1.24235e-235	iCAF	CXCL8
6	2.5061e-225	2.91046	0.837	0.124	8.2428e-221	iCAF	COL7A1
7	3.07476e-197	3.90724	0.633	0.071	1.01132e-192	iCAF	MMP1
8	1.50801e-189	1.86107	0.697	0.093	4.95999e-185	iCAF	SLC16A3
9	8.73496e-184	4.4068	0.529	0.05	2.87302e-179	iCAF	MMP3
10	6.05447e-171	3.01018	0.692	0.098	1.99138e-166	iCAF	CHI3L1
11	1.18625e-164	2.37148	0.326	0.018	3.90169e-160	iCAF	SAA1
12	1.44469e-148	2.09524	0.43	0.039	4.75172e-144	iCAF	CXCL6
13	2.10456e-129	1.86059	0.529	0.072	6.92212e-125	iCAF	MT1F
14	7.31311e-117	1.94356	0.783	0.193	2.40536e-112	iCAF	TMEM158
15	8.22451e-114	3.48067	0.674	0.144	2.70512e-109	iCAF	CXCL1
16	1.34771e-111	2.70866	1	0.99	4.43276e-107	iCAF	FTH1
17	2.78088e-103	1.93932	0.991	0.87	9.14659e-99	iCAF	MIF
18	8.16485e-100	2.05917	0.995	0.937	2.6855e-95	iCAF	GAPDH
19	1.12958e-99	2.52643	0.968	0.551	3.71531e-95	iCAF	SOD2
20	3.62723e-95	2.07761	0.457	0.071	1.19303e-90	iCAF	CXCL3
21	1.13969e-90	2.89569	0.995	0.828	3.74857e-86	iCAF	MT2A
22	2.23311e-85	1.95288	0.751	0.241	7.34492e-81	iCAF	ADM
23	7.72746e-78	1.90204	0.57	0.133	2.54164e-73	iCAF	G0S2
24	1.15347e-75	1.81688	0.946	0.748	3.79389e-71	iCAF	TPI1
25	6.16501e-74	1.81898	0.864	0.431	2.02773e-69	iCAF	COL12A1
26	7.81561e-67	2.29425	0.606	0.174	2.57063e-62	iCAF	ANGPTL4
27	7.23136e-58	2.32443	0.914	0.605	2.37847e-53	iCAF	MT1E
28	7.05708e-51	2.11919	0.701	0.304	2.32114e-46	iCAF	PLAU
29	1.50276e-48	2.14469	0.878	0.514	4.94274e-44	iCAF	MT1X
30	1.74775e-48	2.06314	0.805	0.454	5.74853e-44	iCAF	DDIT4
31	0	3.79811	0.717	0.183	0	mCAF1	POSTN
32	0	2.81512	0.801	0.216	0	mCAF1	CXCL14
33	0	2.22577	0.665	0.281	0	mCAF1	PLAT
34	0	1.997	0.76	0.363	0	mCAF1	PDGFRA
35	0	1.42428	0.884	0.571	0	mCAF1	TMEM176B
36	6.97992e-296	1.70095	0.408	0.015	2.29577e-291	mCAF1	NSG1
37	1.215e-280	1.43268	0.734	0.359	3.99624e-276	mCAF1	VCAN
38	9.85211e-276	1.92565	0.392	0.018	3.24046e-271	mCAF1	ENHO
39	2.8726e-274	1.52132	0.438	0.053	9.44827e-270	mCAF1	PDGFD
40	2.32891e-260	2.71109	0.458	0.07	7.66003e-256	mCAF1	CCL11
41	1.7158e-259	1.36738	0.388	0.023	5.64345e-255	mCAF1	HSD17B2
42	2.55637e-257	1.98918	0.624	0.272	8.40816e-253	mCAF1	F3
43	4.87626e-249	1.19988	0.728	0.401	1.60385e-244	mCAF1	EMILIN1
44	2.38267e-247	1.1632	0.821	0.643	7.83684e-243	mCAF1	NBL1
45	1.19338e-226	1.32474	0.455	0.103	3.92513e-222	mCAF1	EMID1
46	3.2166e-213	1.19371	0.343	0.027	1.05797e-208	mCAF1	WNT4
47	1.1849e-204	1.68759	0.418	0.084	3.89724e-200	mCAF1	AGT
48	4.36924e-200	1.48072	0.551	0.23	1.43709e-195	mCAF1	BMP4
49	4.94352e-194	1.15287	0.64	0.322	1.62597e-189	mCAF1	PDPN
50	1.56564e-181	1.55997	0.648	0.301	5.14953e-177	mCAF1	APOD
51	1.39697e-157	1.36201	0.226	0.001	4.59478e-153	mCAF1	VSTM2A
52	2.99191e-140	1.65716	0.763	0.567	9.84069e-136	mCAF1	CTGF
53	5.51904e-120	1.30732	0.784	0.627	1.81527e-115	mCAF1	IGFBP5
54	7.72212e-119	1.56661	0.396	0.139	2.53988e-114	mCAF1	IGFBP3
55	2.34374e-107	1.26586	0.462	0.207	7.70879e-103	mCAF1	PTGDS
56	4.5349e-86	1.51808	0.162	0.017	1.49157e-81	mCAF1	PPAP2B
57	1.10475e-65	2.77893	0.131	0.015	3.63362e-61	mCAF1	CST1
58	8.80013e-63	1.27671	0.198	0.056	2.89445e-58	mCAF1	GNB2L1
59	2.66132e-62	1.26548	0.376	0.232	8.75335e-58	mCAF1	ABCA8
60	4.9888e-62	1.20574	0.23	0.083	1.64087e-57	mCAF1	DEFB1
61	0	4.91094	0.602	0.042	0	mCAF2	PLA2G2A
62	0	4.21196	0.821	0.285	0	mCAF2	CLEC3B
63	0	4.09972	0.963	0.128	0	mCAF2	SFRP2
64	0	4.02502	0.996	0.513	0	mCAF2	CFD
65	0	3.88476	0.955	0.169	0	mCAF2	CLU
66	0	3.71967	0.534	0.008	0	mCAF2	MYOC
67	0	3.68015	0.72	0.022	0	mCAF2	PI16
68	0	3.58038	0.896	0.076	0	mCAF2	SFRP1
69	0	3.46482	0.853	0.075	0	mCAF2	MFAP5
70	0	3.37821	0.998	0.527	0	mCAF2	MGP
71	0	3.30195	0.993	0.815	0	mCAF2	GSN
72	0	3.25748	0.972	0.536	0	mCAF2	IGFBP6
73	0	2.98645	0.693	0.072	0	mCAF2	SLPI
74	0	2.53384	0.979	0.436	0	mCAF2	CCDC80
75	0	2.47799	0.877	0.119	0	mCAF2	FBLN2
76	0	2.4727	0.657	0.021	0	mCAF2	WISP2
77	0	2.44164	0.994	0.589	0	mCAF2	FBLN1
78	0	2.32162	0.952	0.344	0	mCAF2	EFEMP1
79	0	2.30436	0.985	0.598	0	mCAF2	PLAC9
80	0	2.27552	0.895	0.2	0	mCAF2	ADH1B
81	0	2.21956	0.879	0.072	0	mCAF2	OGN
82	0	2.19053	0.948	0.3	0	mCAF2	C3
83	0	2.16473	0.86	0.163	0	mCAF2	GPNMB
84	0	2.099	0.999	0.846	0	mCAF2	DCN
85	0	2.09434	0.88	0.164	0	mCAF2	MGST1
86	0	2.01355	0.879	0.17	0	mCAF2	TNXB
87	0	1.87593	0.81	0.105	0	mCAF2	PRELP
88	0	1.87346	1	0.932	0	mCAF2	CST3
89	3.22982e-212	2.20405	0.559	0.156	1.06232e-207	mCAF2	RARRES1
90	4.34667e-12	1.86931	0.331	0.219	1.42966e-07	mCAF2	IGKV3-20
91	2.17355e-232	4.10184	0.696	0.059	7.14902e-228	vCAF1	HHIP
92	4.30825e-227	2.39902	0.596	0.041	1.41703e-222	vCAF1	NPNT
93	2.60905e-219	3.43454	0.918	0.12	8.58144e-215	vCAF1	MYH11
94	5.84344e-212	2.26154	0.684	0.062	1.92197e-207	vCAF1	KCNMB1
95	3.79184e-205	4.5374	0.924	0.145	1.24717e-200	vCAF1	ACTG2
96	1.77019e-152	3.4998	0.368	0.022	5.82232e-148	vCAF1	DES
97	3.1061e-145	1.86205	0.468	0.04	1.02163e-140	vCAF1	WFDC2
98	8.47405e-138	2.72016	0.778	0.136	2.7872e-133	vCAF1	CNN1
99	7.80354e-105	1.88066	0.509	0.07	2.56666e-100	vCAF1	COL23A1
100	1.07831e-104	2.87878	0.947	0.395	3.54666e-100	vCAF1	MYLK
101	7.26437e-96	1.90517	0.632	0.122	2.38932e-91	vCAF1	SORBS1
102	1.07209e-95	2.79918	0.988	0.539	3.5262e-91	vCAF1	ACTA2
103	6.12524e-94	2.15645	0.795	0.221	2.01465e-89	vCAF1	LMOD1
104	5.34819e-91	2.84939	0.743	0.205	1.75907e-86	vCAF1	CKB
105	2.00318e-87	2.53812	1	0.594	6.58866e-83	vCAF1	TAGLN
106	7.19577e-86	2.58752	0.971	0.594	2.36676e-81	vCAF1	FLNA
107	5.12336e-82	2.30483	0.994	0.752	1.68513e-77	vCAF1	TPM1
108	1.49629e-74	1.73137	0.988	0.953	4.92145e-70	vCAF1	MYL6
109	1.99468e-74	2.12932	0.982	0.806	6.5607e-70	vCAF1	TPM2
110	2.87918e-73	2.27948	0.883	0.445	9.4699e-69	vCAF1	PDLIM3
111	1.46625e-68	1.94044	0.895	0.446	4.82264e-64	vCAF1	CSRP1
112	1.01073e-66	1.88302	0.988	0.808	3.32439e-62	vCAF1	MYL9
113	1.13751e-65	2.20437	0.83	0.388	3.74138e-61	vCAF1	LTBP1
114	2.86486e-60	1.73453	0.895	0.475	9.42282e-56	vCAF1	ACTN1
115	2.67242e-57	1.68682	0.76	0.284	8.78986e-53	vCAF1	WFDC1
116	1.71001e-56	1.76316	0.895	0.53	5.6244e-52	vCAF1	LPP
117	2.02811e-54	1.71762	0.947	0.8	6.67066e-50	vCAF1	NDUFA4
118	5.63716e-52	1.67412	0.784	0.346	1.85412e-47	vCAF1	SYNPO2
119	1.87503e-45	1.67994	0.889	0.638	6.16717e-41	vCAF1	FHL1
120	9.0115e-44	1.68079	0.637	0.256	2.96397e-39	vCAF1	SMTN
121	0	4.38814	0.923	0.166	0	vCAF2	RGS5
122	0	3.2892	0.86	0.133	0	vCAF2	NDUFA4L2
123	0	2.94085	0.595	0.018	0	vCAF2	CD36
124	0	2.74918	0.681	0.026	0	vCAF2	COX4I2
125	0	2.58761	0.764	0.118	0	vCAF2	ARHGDIB
126	0	2.4702	0.609	0.034	0	vCAF2	GJA4
127	0	2.40463	0.568	0.012	0	vCAF2	HIGD1B
128	0	2.22323	0.691	0.121	0	vCAF2	NOTCH3
129	0	1.87169	0.472	0.045	0	vCAF2	STEAP4
130	0	1.86402	0.995	0.931	0	vCAF2	IGFBP7
131	0	1.79082	0.578	0.067	0	vCAF2	TINAGL1
132	0	1.71188	0.508	0.051	0	vCAF2	FAM162B
133	3.71505e-299	2.08177	0.689	0.169	1.22192e-294	vCAF2	CSRP2
134	3.84893e-297	1.81192	0.601	0.13	1.26595e-292	vCAF2	45173
135	1.72779e-271	1.73519	0.622	0.141	5.68288e-267	vCAF2	MCAM
136	1.48906e-267	2.15091	0.693	0.212	4.89768e-263	vCAF2	IGFBP2
137	8.75706e-243	1.67924	0.599	0.17	2.88029e-238	vCAF2	MYO1B
138	1.54992e-219	2.36503	0.78	0.435	5.09785e-215	vCAF2	COL4A1
139	1.93512e-192	1.95395	0.807	0.55	6.36481e-188	vCAF2	COL4A2
140	4.37033e-184	1.87618	0.536	0.149	1.43745e-179	vCAF2	FABP5
141	2.86862e-178	1.90658	0.666	0.284	9.43517e-174	vCAF2	FRZB
142	6.80987e-178	1.5715	0.646	0.276	2.23983e-173	vCAF2	EPAS1
143	1.26887e-174	1.73793	0.701	0.343	4.17344e-170	vCAF2	MAP1B
144	1.18896e-169	1.82993	0.79	0.566	3.9106e-165	vCAF2	COL18A1
145	7.15651e-164	1.67311	0.702	0.396	2.35385e-159	vCAF2	PDGFRB
146	1.42134e-107	2.54086	0.316	0.079	4.67494e-103	vCAF2	FABP4
147	1.65686e-74	1.76212	0.367	0.136	5.44957e-70	vCAF2	FP236383.1
148	3.66322e-64	1.83391	0.29	0.104	1.20487e-59	vCAF2	RPL41P1
149	4.05975e-10	6.16246	0.117	0.064	1.33529e-05	vCAF2	IGHV7-4-1
150	0.0016445	5.39917	0.132	0.104	1	vCAF2	IGLV3-25
151	0	3.37445	0.928	0.09	0	vCAF3	MYH11
152	0	2.86638	0.726	0.057	0	vCAF3	SORBS2
153	0	2.62753	0.632	0.06	0	vCAF3	SNCG
154	0	2.30418	0.501	0.006	0	vCAF3	RERGL
155	0	2.18115	0.642	0.023	0	vCAF3	PLN
156	3.67794e-305	2.28593	0.675	0.082	1.20971e-300	vCAF3	BCAM
157	2.67998e-300	1.80363	0.775	0.1	8.81473e-296	vCAF3	TINAGL1
158	1.0368e-280	2.37418	0.928	0.2	3.41016e-276	vCAF3	CSRP2
159	1.05827e-266	2.27034	0.647	0.086	3.48076e-262	vCAF3	C2orf40
160	4.04241e-229	3.19722	0.987	0.444	1.32959e-224	vCAF3	ADIRF
161	3.26612e-223	3.36004	0.997	0.579	1.07426e-218	vCAF3	TAGLN
162	2.26625e-215	2.11998	0.673	0.12	7.45391e-211	vCAF3	CNN1
163	1.00599e-200	2.76642	1	0.801	3.3088e-196	vCAF3	MYL9
164	3.69472e-196	2.9692	0.982	0.523	1.21523e-191	vCAF3	ACTA2
165	1.51188e-182	2.34969	0.985	0.804	4.97273e-178	vCAF3	DSTN
166	1.60495e-149	2.30121	0.987	0.8	5.27884e-145	vCAF3	TPM2
167	2.25337e-136	2.30404	0.916	0.51	7.41157e-132	vCAF3	CRIP1
168	5.80182e-134	2.03248	0.867	0.432	1.90828e-129	vCAF3	CSRP1
169	7.10149e-132	2.07613	0.742	0.275	2.33575e-127	vCAF3	PCSK7
170	3.151e-131	1.81521	0.887	0.456	1.03639e-126	vCAF3	CRIP2
171	1.30108e-122	2.64387	0.816	0.37	4.2794e-118	vCAF3	MT1M
172	2.98619e-116	1.80285	0.88	0.431	9.82188e-112	vCAF3	PPP1R14A
173	7.8957e-113	1.81969	0.903	0.585	2.59697e-108	vCAF3	FLNA
174	7.35465e-92	2.24445	0.852	0.54	2.41902e-87	vCAF3	GADD45B
175	1.2392e-53	1.9355	0.772	0.511	4.07586e-49	vCAF3	MT1X
176	1.70088e-49	1.86103	0.478	0.193	5.59436e-45	vCAF3	MT1A
177	9.19059e-48	1.85032	0.777	0.53	3.02288e-43	vCAF3	CDKN1A
178	5.32466e-30	2.51366	0.12	0.023	1.75133e-25	vCAF3	CCL21
179	1.057e-21	2.68902	0.123	0.031	3.47658e-17	vCAF3	CCL19
180	6.31827e-12	2.03576	0.194	0.095	2.07814e-07	vCAF3	CH25H
