# Supplementary material for: Single-cell dissection of prognostic architecture and immunotherap response in Helicobacter pylori infection-associated gastric cancer
Source: eLife. 2025 Jun 17;13:RP99337. doi: 10.7554/eLife.99337 (PMC12173458; doi:10.7554/eLife.99337)
Supplement: Supplementary file 7. [file elife-99337-supp7.xlsx]

## Sheet: Table S7
Supplementary Table S7 Multilabel immunofluorescence staining antibody
Panel	Primary Antibodies	dilution	Secondary Antibodies	dilution
Figure 4K	TIGIT (ab243903, Abcam, UK)	1:800	Polymer HRP-anti-Mouse/Rabbit IgG (10013001010, Panovue, China)	1: 3
	CD8A-CST70306	1:100
	Nectin 2 (ab233384, Abcam, UK)	1:150
	CD4 (ZM0418, Zsgb-Bio, China)	1:200
	Pan-CK (CST4545, CST, USA)	1:500
Figure 5G	SPP1 (ab214050, Abcam, UK)	1:1000
	VEGFA (66828-1-Ig, proteintech, USA)	1:300
	CD68 (CST76437, CST, USA)	1:500
	TREM2 (ab223684, Abcam, UK)	1:300	Donkey anti-Goat IgG H&L (HRP) (ab6885, Abcam, UK)	1: 800
